# Supplementary material
Source: PubMed Central journal article supplement (PMC3699282)
Supplement: supp_140.14.2972_DEV090050.pdf [file supp_140.14.2972_DEV090050.pdf]

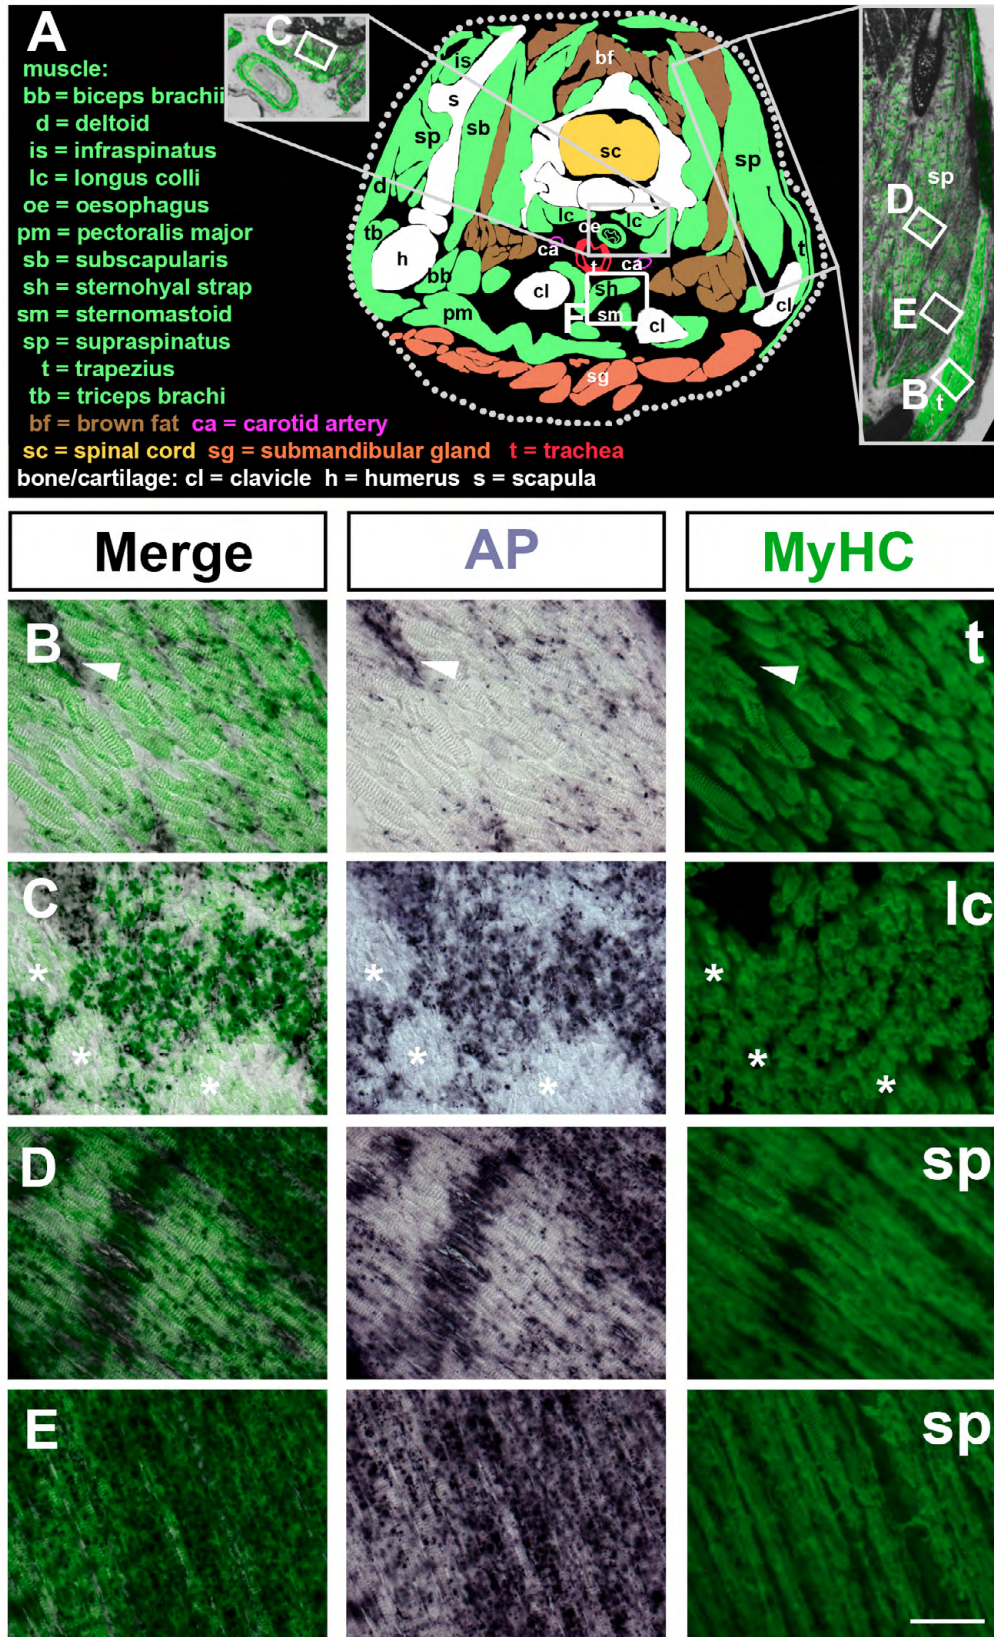

**Fig. S1. Origin of cells in P0 muscle revealed by cell lineage tracing in *Pax3<sup>Cre</sup>* mice.** Cryosections of P0 *Pax3<sup>Cre</sup>;Z/AP* mouse stained for alkaline phosphatase (AP, black, merge) and MyHC (green). (A) Schematic of a neck section at the level of the head of the right humerus where it meets the scapula (left). Insets of oesophageal (left) and left lateral (right) boxed regions, indicating anatomical location of images in B-F. (B) Oblique section of a cucullaris-derived trapezius muscle (t) containing little or no AP activity above that observed in sibling *Z/AP* mice lacking Cre. There is staining of Pax3-expressing putative Schwann cell precursors in intramuscular nerves (arrowhead) (Kioussi et al. 1995). (C) Transverse section of longus colli (lc) muscle which, although generally AP<sup>+</sup>, had distinct patches of fibres lacking AP stain (asterisks). (D,E) Distinct regions of longitudinally sectioned supraspinatus muscle (sp) with marked bands (D) or more uniform staining (E). Scale bar: 50  $\mu$ m in B-E.



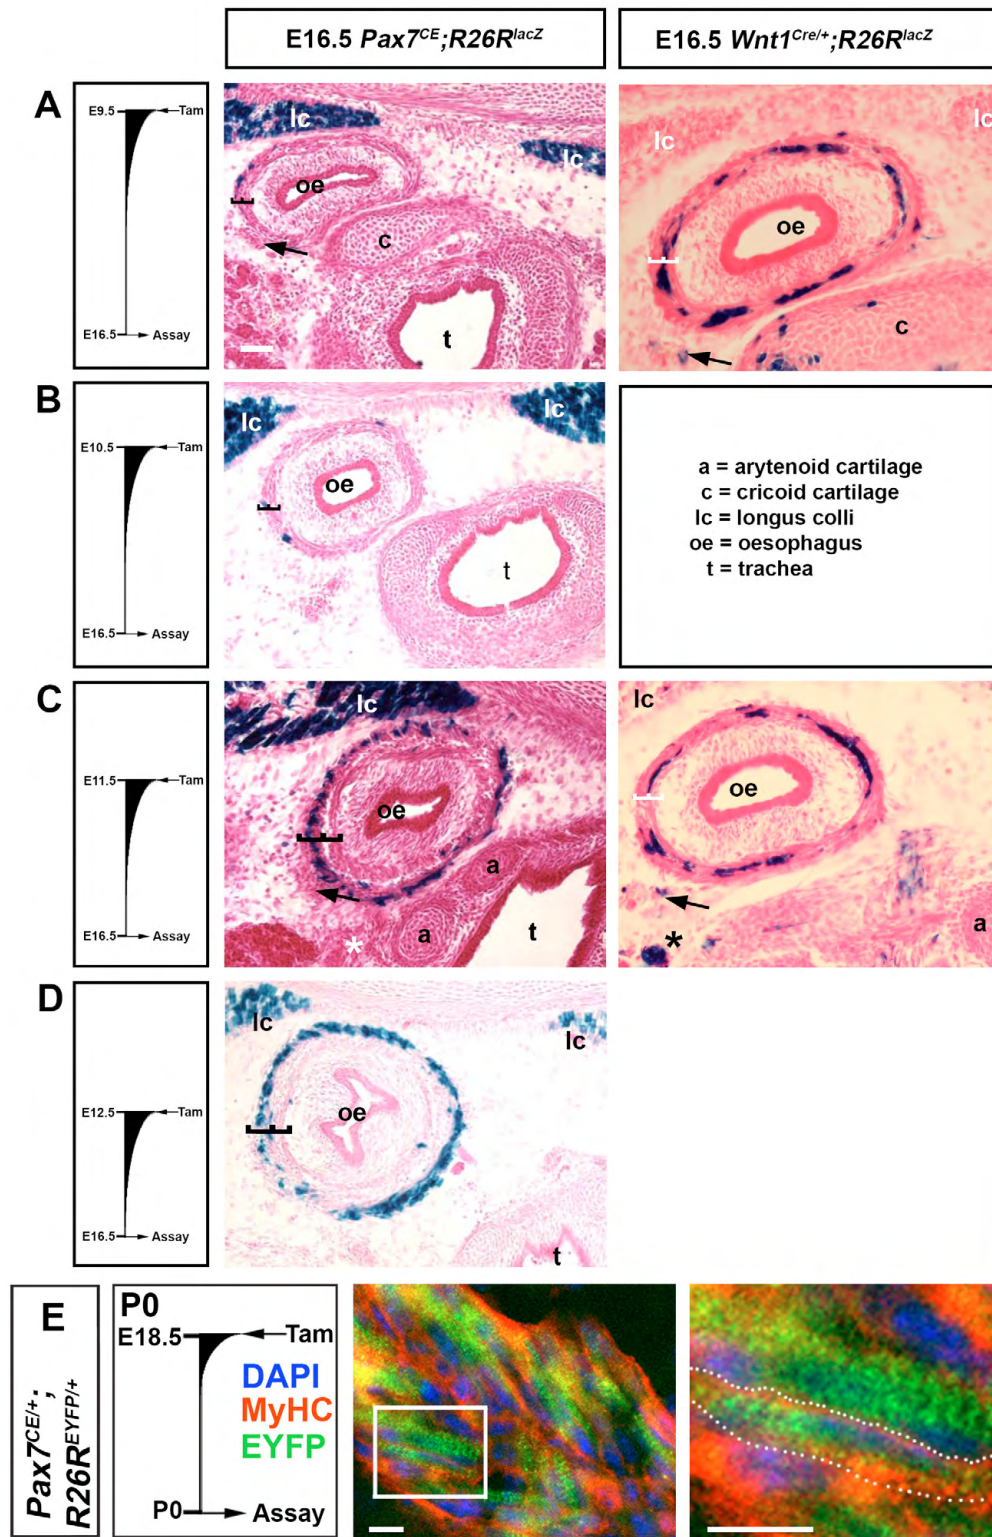

**Fig. S2. Origin of cells in E16.5 oesophagus revealed by cell lineage tracing in *Pax7<sup>CE</sup>* mice.** *Wnt1<sup>Cre</sup>;R26R<sup>lacZ</sup>* (right column) or *Pax7<sup>CE</sup>;R26R<sup>lacZ</sup>* mice treated with tamoxifen at the indicated times (left column) were collected at E16.5 and transverse sections of the oesophagus (oe) were stained with Xgal (blue) and eosin (pink). (A) When tamoxifen was administered at E9.5, there were rare marked cells in outer longitudinal muscle layer at E16.5 (bracket), in which the first OSM cells have recently appeared (see Fig. 1B,D,F,I,J), and the longus capitis (lc) muscle was abundantly labelled. By contrast, *Wnt1<sup>Cre</sup>;R26R<sup>lacZ</sup>* mice were primarily marked between the inner and outer smooth muscle layers (bracket), and in flanking nerves (arrows), which are unmarked by *Pax7<sup>CE</sup>;R26R<sup>lacZ</sup>*. (B) Tamoxifen administration 1 day later, at E10.5, marked more cells at a similar cranial level, as shown by presence of tracheal (t) cartilage in the sections. (C) Tamoxifen treatment at E11.5 led to more abundant marking of the outer longitudinal OSM layer, but a striking lack of X-gal staining in the inner circumferential muscle layer (brackets). At the same anteroposterior level, *Wnt1<sup>Cre</sup>;R26R<sup>lacZ</sup>* mice have marked cells between the muscle layers (brackets). (D) Tamoxifen administration at E12.5 marked many cells in the outer layer, and fewer cells in the inner layer (brackets). (E) *Pax7<sup>CE</sup>;R26R<sup>EYFP</sup>* treated with tamoxifen at E18.5 showed EYFP marking of both inner and outer muscle layers at P0 (similar region to box H in Fig. 1J). Scale bars: 50  $\mu$ m in A-D; 20  $\mu$ m in E.

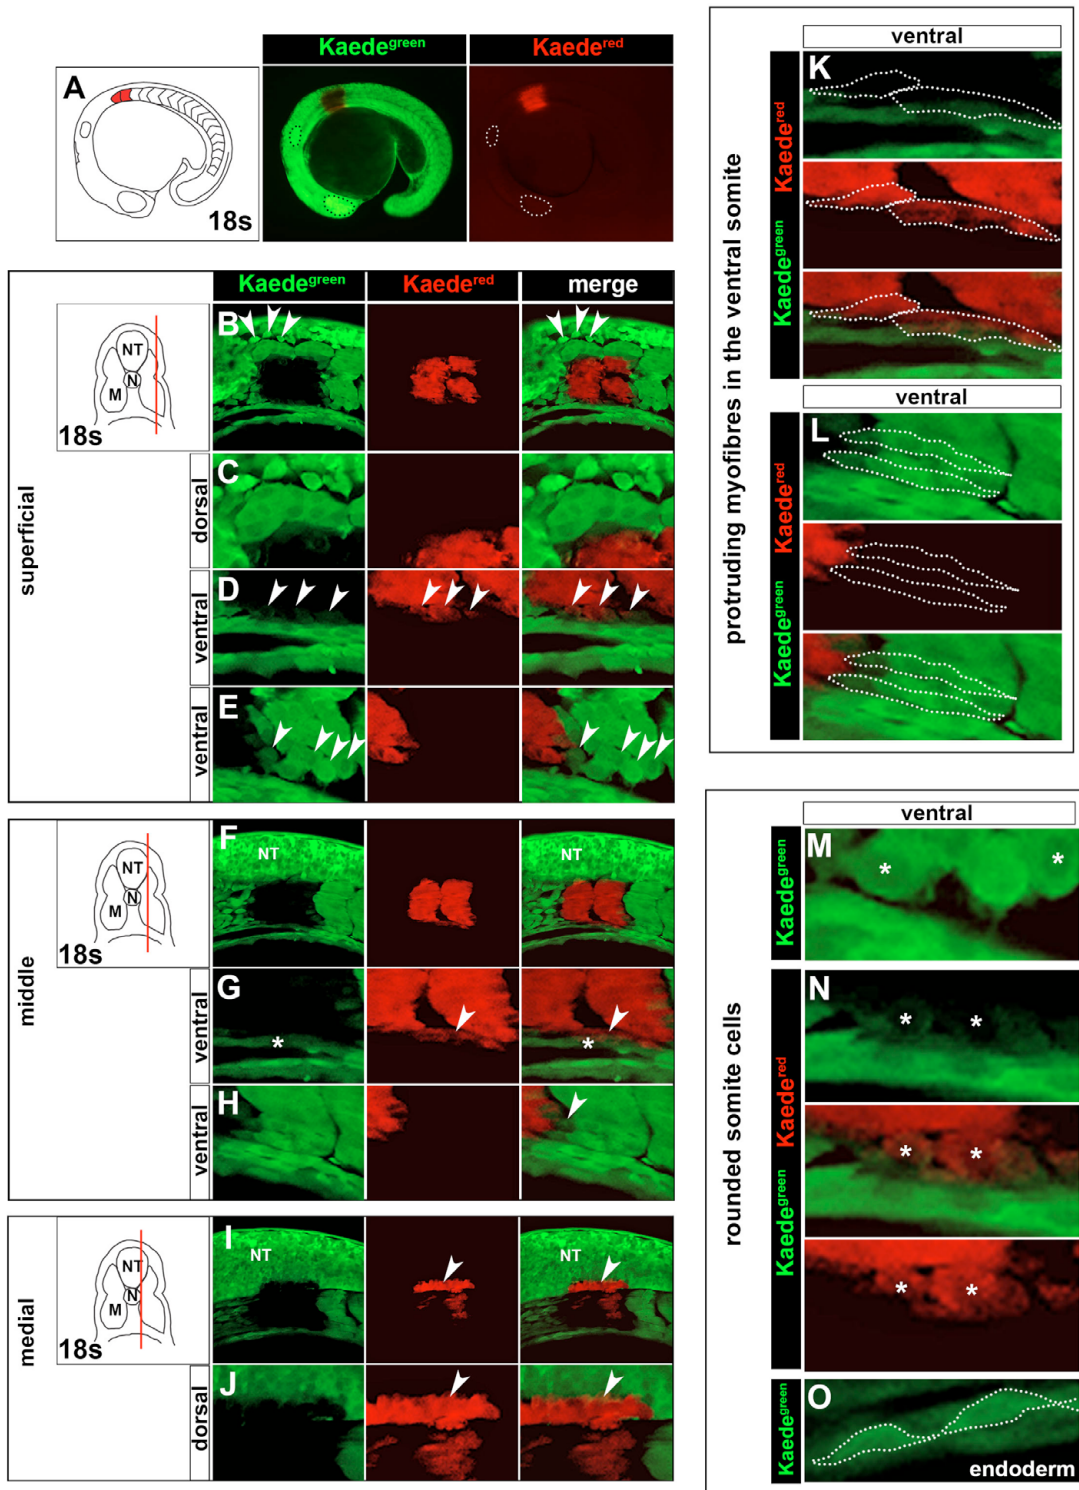

**Fig. S3. Precision of Kaede photoconversion within the anterior somites of zebrafish.** Primary green Kaede (Kaede<sup>green</sup>) fluorescence and photoconverted red Kaede (Kaede<sup>red</sup>) fluorescence. All images are whole-mount lateral views of a single embryo taken immediately after photoconversion, with anterior towards the left and dorsal towards the top. (A) Stereomicroscopic view of S1+2 photoconversion at 18 ss. (B) Superficial section through a ventral region photoconversion of S1+2 at 18 ss to avoid neural crest cells in the migratory zone (arrowheads). (C) Higher magnification view of unconverted neural crest cells. (D,E) Mesenchymal Kaede<sup>red</sup> cells in ventral somite regions (D, arrowheads) share similar morphology to Kaede<sup>green</sup> somite cells (E, arrowheads). These cells are shown at higher magnification in M,N. (F) Middle section through a ventral region photoconversion of S1+2 at 18 ss. (G,H) Kaede<sup>red</sup> cells in ventral somite regions (G, arrowheads) are distinct from endoderm (G, asterisk) and share identical morphology to Kaede<sup>green</sup> myofibres that protrude anteriorly from the ventral somite (H, arrowhead). These cells are shown at higher magnification in K,L. (I,J) Medial section through a ventral region photoconversion of S1+2 at 18 ss reveals neural tube (NT) photoconversion (arrowheads). (K,L) High magnification of Kaede<sup>red</sup> or Kaede<sup>green</sup> myofibres that protrude from the ventral somite (dotted lines). (M,N) Mesenchymal Kaede<sup>green</sup> or Kaede<sup>red</sup> ventral somite cells have similar rounded morphology distinct from fibres that includes large intracellular zones of low Kaede fluorescence (asterisks). (O) These 'rounded' somite cells are distinct from endoderm cells, which are tightly connected and have a distinctive 'flattened' morphology (dotted lines).



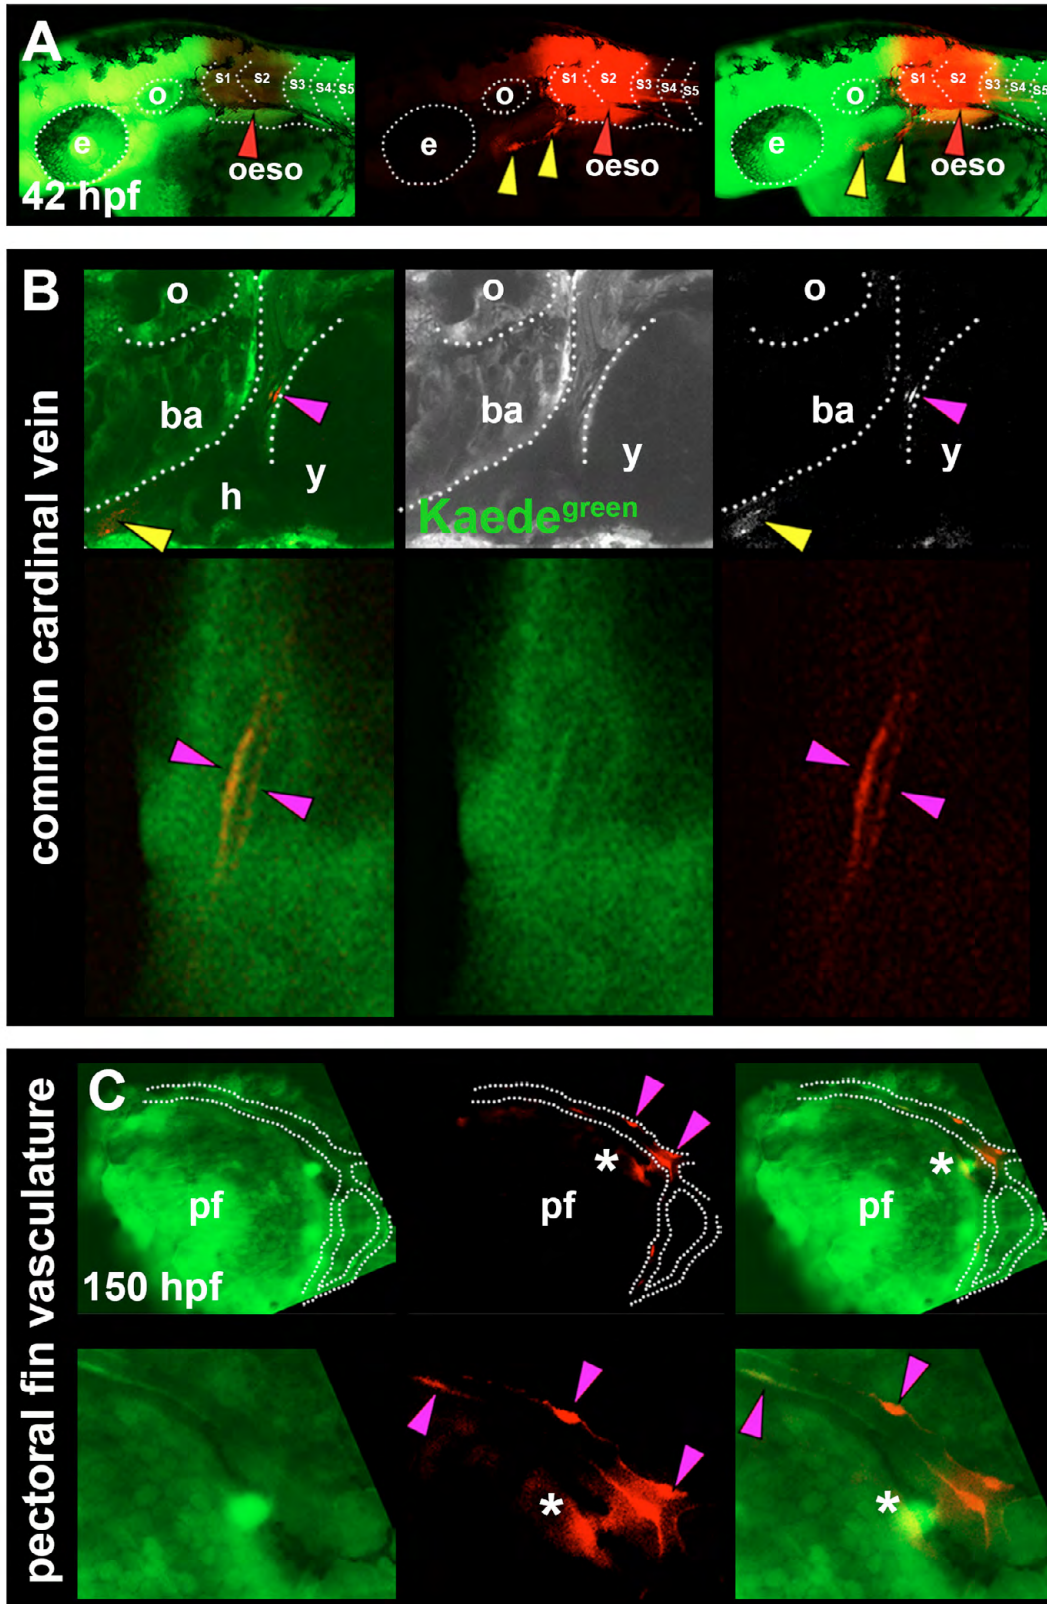

**Fig. S4. Cells associated with the heart and pectoral fin vasculature are derived from anterior somites in zebrafish.** Primary green Kaede (Kaede<sup>green</sup>) fluorescence and photoconverted red Kaede (Kaede<sup>red</sup>) fluorescence. All images are lateral view wholemounts with anterior towards the left and dorsal towards the top. **(A)** Kaede<sup>red</sup> fluorescence localised to the oesophagus after photoconversion at 18 ss (red arrowheads). SHM was also labelled with Kaede<sup>red</sup> (yellow arrowheads). **(B)** Photoconversion of S2 at 14-18 ss marks vascular elements associated with the common cardinal vein (magenta arrowheads) and SHM (yellow arrowheads). **(C)** In addition, cells associated with pectoral fin vasculature and other unidentified cells were labelled after photoconversion of S1/2 (magenta arrowheads and asterisks, respectively). Labelled blood vessels were observed only in tissues adjacent to the original somites converted, suggesting regional restriction of somite-derived vasculature. ba, branchial arches; oeso, oesophagus; h, heart; pf, pectoral fin; o, otic vesicle; y, yolk.



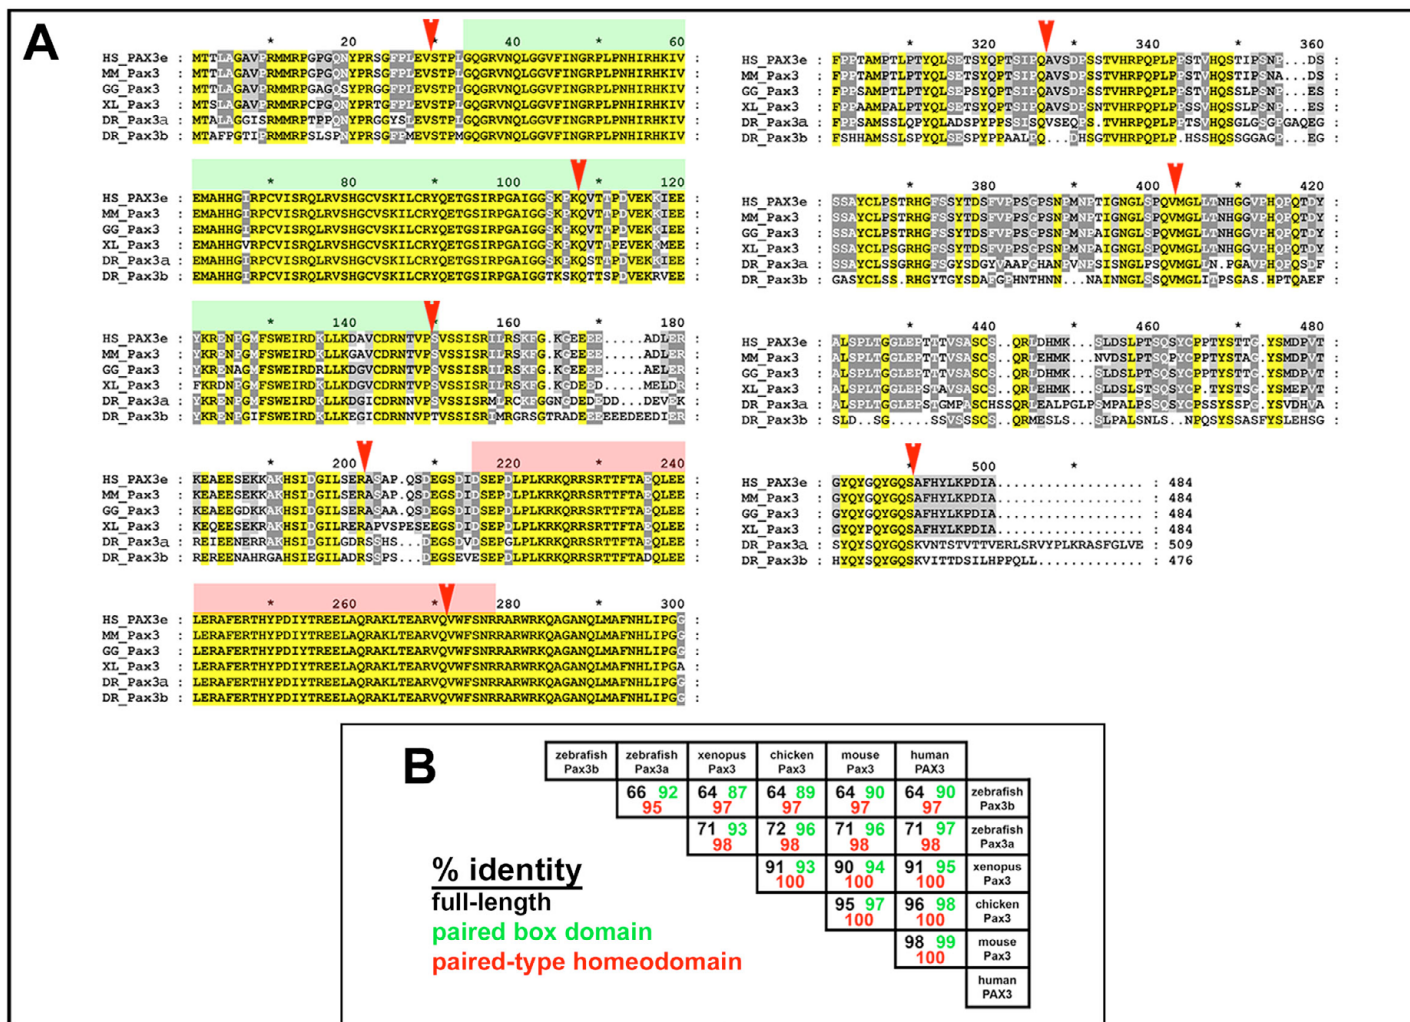

**Fig. S5. Sequence comparison of zebrafish Pax3b.** (A) Alignment of vertebrate Pax3 family proteins showing fully (yellow) and partially (grey) conserved amino acids, paired (green) and homeodomain (pink) regions, and exon borders (red arrowheads). (B) Pax3a has a higher level of conservation to mammalian Pax3 than does Pax3b.

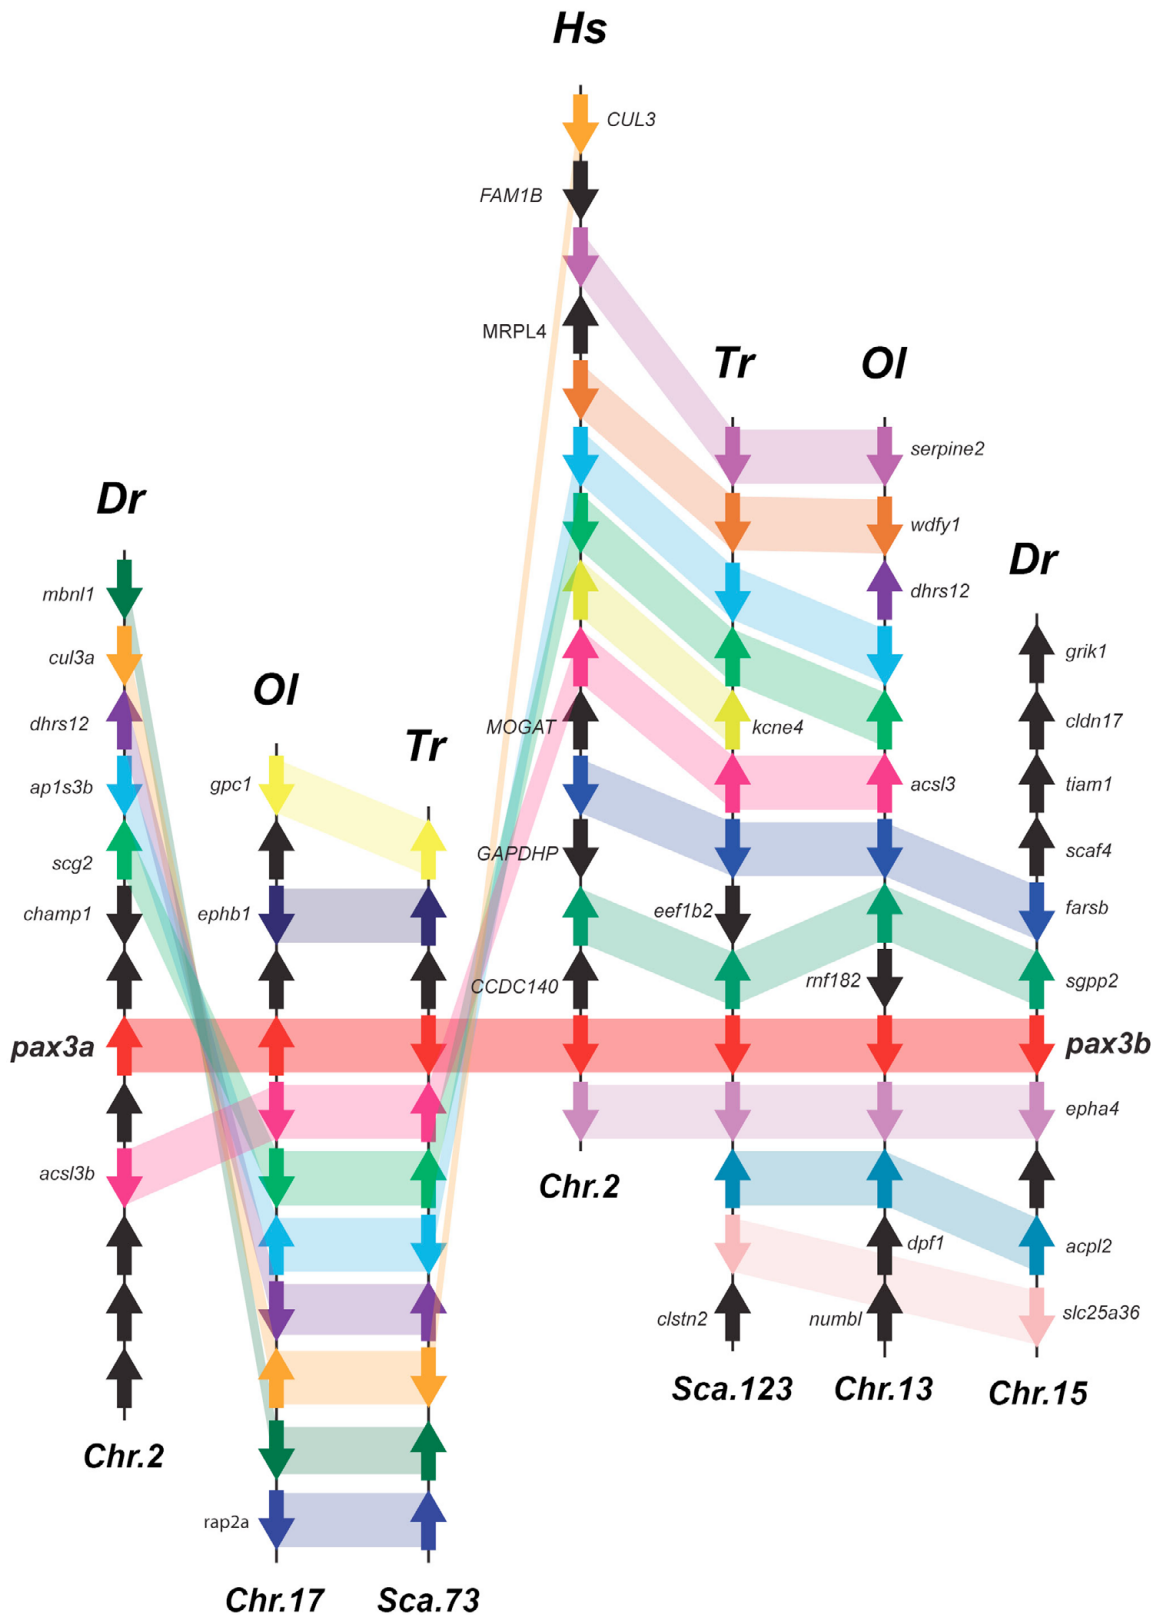

**Fig. S6. Synteny analysis of Pax3 genes.** ENSEMBL genomic structures (August 2012) were used to determine gene order and orientation around Pax3 loci in three species of teleost, *Danio rerio* (Dr, Zv9), *Takifugu rubripes* (Tr, FUGU4) and *Oryzias latipes* (Ol, MEDAKA1), and to compare with *Homo sapiens* (Hs, GRCh37). Gene homologues are linked by coloured ribbons to aid comparison. *pax3a* (left) and *pax3b* (right) are duplicated in teleosts, and the conserved synteny of both orthologues with *PAX3* on *Hs* chromosome 2. All three teleost *pax3b* genes retain synteny and orientation with the close neighbour human genes *FARSB* and *SGPP2* at the 5' side and *EPHA4* at the 3' side. However, between the two major branches of teleosts, the euteleosts (Tr and Ol) retain more extensive 5' synteny than does the ostarioclupeomorph zebrafish. Teleost *pax3a* genes also retain extensive synteny with the 5' region of *PAX3*, but in this case zebrafish *pax3a* appears to have retained better the mammalian chromosome structure, whereas the euteleosts seem to have undergone repeated inversions.



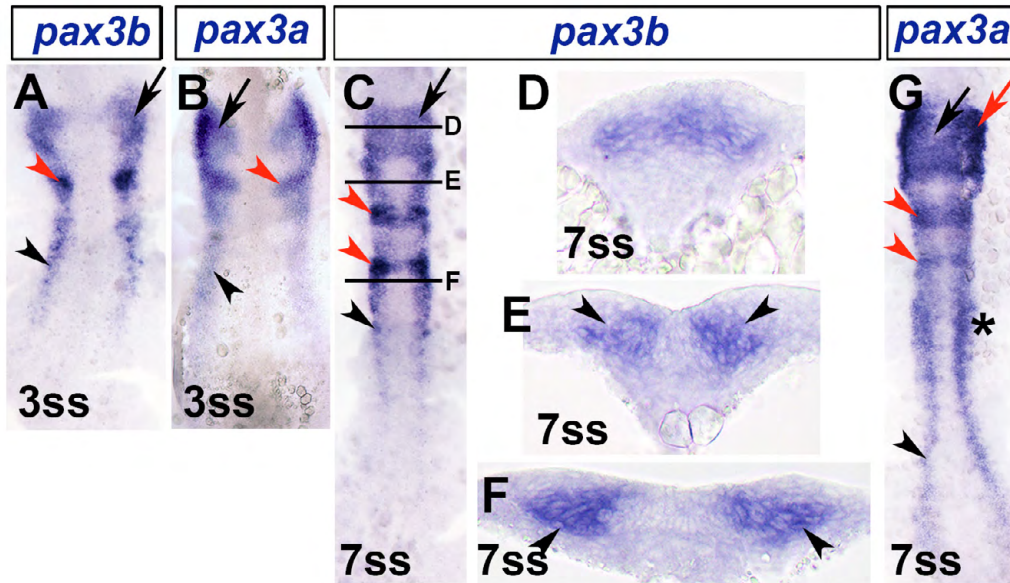

**Fig. S7. Expression analysis of zebrafish *pax3a* and *pax3b*.** *In situ* mRNA hybridization for *pax3b* (A,C-F,H-K) and *pax3a* (B,G,L-N). Dorsal flatmounts have anterior towards the top (A-C,G). Transverse cryosections have dorsal towards top (D-F). Lateral view wholemounts have anterior to left and dorsal to top (H,I,K-N). Dorsal wholemounts have anterior to left (J). (A,B) *pax3b* and *pax3a* mRNA at 3 ss were located in neural tissue in cranial regions (black arrow), including prospective rhombomere 2 (red arrowhead) and bilateral stripes corresponding to lateral neural plate (black arrowhead). (C-F) At 7 ss, *pax3b* continued to be expressed in cranial neural tissue (black arrow), including rhombomeres 2 and 4 (red arrowheads) and bilateral stripes in posterior of embryo (black arrowhead). Black bars in C denote level of section in D-F *pax3b* mRNA was located in dorsal region of neural tube within more developed neural tissue (D). Posteriorly, in less developed neural tissue (E), *pax3b* was located at lateral margin of neural plate (black arrowheads, F). (G) *pax3a* mRNA was also detected in lateral neural plate at 7 ss (black arrowhead), in addition to somites (asterisk), cranial neural crest (black arrow) and rhombomeres 2 and 4 (red arrowheads). (H-K) At subsequent embryonic (H-J, 55 hpf) but not larval (K, 5 dpf) stages, *pax3b* mRNA was detected weakly in pectoral fin (green arrowheads) and more readily in MMPs located close to the somite (white arrowheads). (L-N) *pax3a* mRNA was detected in pectoral fin muscle of late embryo (green arrowheads, L,M), but not larva (N). nt, neural tube.

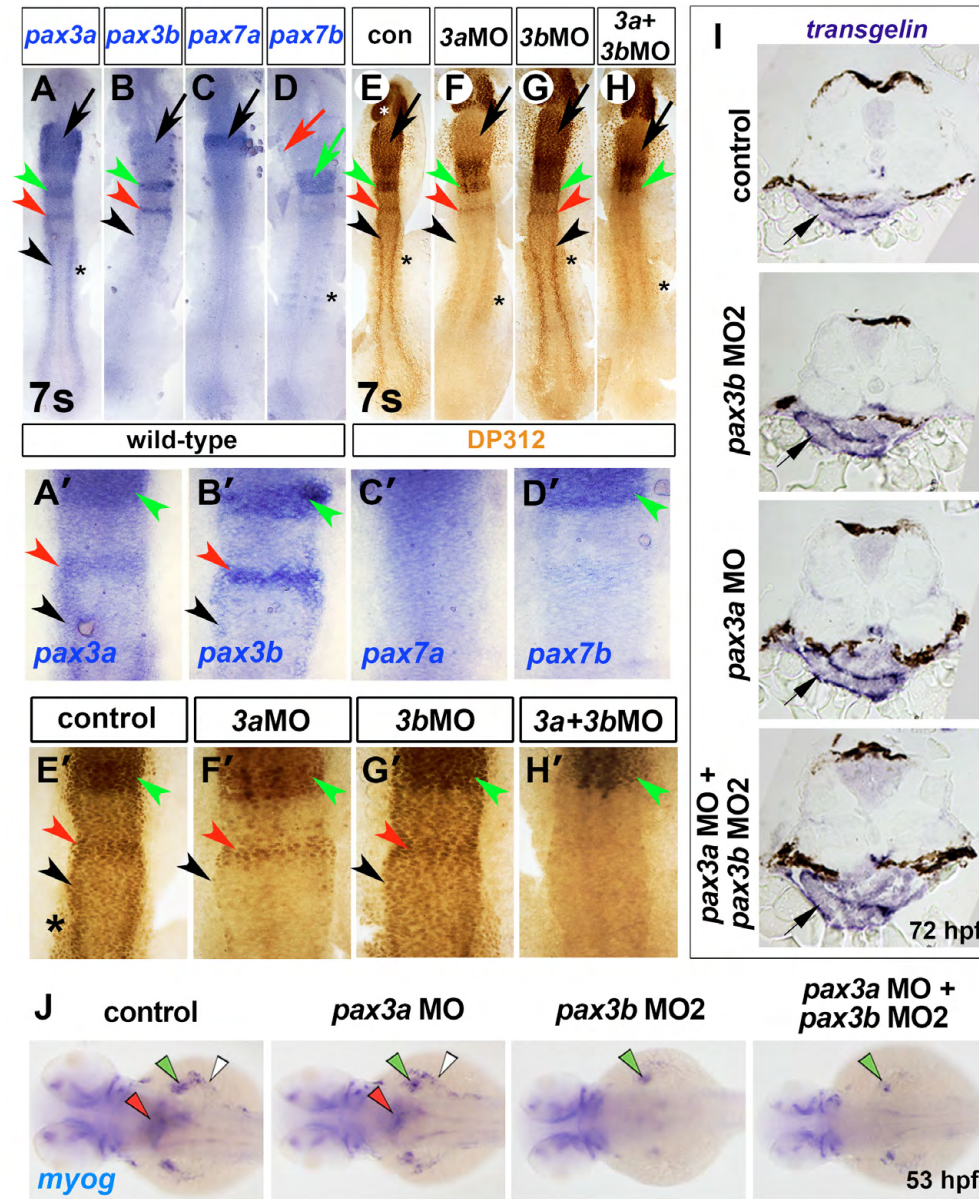

**Fig. S8. *pax3b* morpholinos specifically reduce Pax3b protein but not *transgelin* expression.** *In situ* mRNA hybridization for *pax3a* (A,A'), *pax3b* (B,B'), *pax7a* (C,C'), *pax7b* (D,D'), *transgelin* (I), *myog* (J) and parallel immunodetection of nuclear Pax3/7 protein (brown, DP312 antibody, E-H') in 7 ss embryos injected with the indicated MOs. Dorsal view flatmounts with anterior towards the top (A-H') or left (J). Transverse cryosections with dorsal towards the top (I). (A-B') *pax3a* was detected in rhombomeres 2 (green arrowheads, A,A') and 4 (red arrowheads, A,A'), lateral neural plate (black arrowheads, A,A') and somites (asterisk, A,A'). Concurrently, *pax3b* mRNA was also observed in rhombomere 2 (green arrowhead, B,B'), rhombomere 4 (red arrowhead, B,B') and lateral neural plate (black arrowhead, B,B') but was lacking in somites (B,B'). (C-D') The related *pax3/7* family member *pax7a* was expressed solely in the midbrain region (black arrow, C), whereas *pax7b* mRNA was detected in somites (asterisk, D) and a broad anterior hindbrain region (green arrow and arrowhead, D,D'). Therefore, of *pax3/7* family members, *pax3a* was the most widely and abundantly expressed at 7 ss, encompassing expression domains of all other *pax3/7* family members. (E,E') Pax3/7 immunoreactivity closely resembles the sum of all *pax3/7* mRNA localisation, with the addition of signal in the forming retina owing to the known reaction of DP312 with Rx proteins (asterisks, E) (Davis et al. 2005). (F-G') Injection of MO1 specific to *pax3b* did not result in a detectable reduction of Pax3/7 protein (G,G'), in agreement with residual reactivity to other Pax3/7 proteins, particularly Pax3a. After MO1-mediated Pax3a reduction (F,F'), Pax3/7 protein is clearly evident in regions of *pax3b* expression including rhombomere 2 (F,F', green arrowheads), rhombomere 4 (F,F', red arrowheads) and lateral neural plate (F,F', black arrowheads), suggesting that residual Pax3/7 reactivity represents Pax3b. Using two non-overlapping *pax3a* MOs, we failed to observe the head phenotype previously described for *pax3a* knockdown (Lin et al. 2009). (H,H') Knockdown of both Pax3b and Pax3a proteins resulted in the ablation of the residual Pax3/7 immunoreactivity in rhombomere 4 and lateral neural plate, which corresponded to Pax3b. Remaining Pax3/7 protein anteriorly is likely to reflect Pax7b protein (green arrowhead, H') (Davis et al. 2005; Minchin and Hughes 2008). Therefore, we conclude that residual immunoreactivity after Pax3a reduction corresponds in part to Pax3b protein and that this is specifically reduced by *pax3b* MO1, which does not itself target Pax3a. Similar results were obtained with *pax3a* MO2 and *pax3b* MO2 (Table S1). (I) *transgelin* mRNA in oesophagus at 72 hpf did not change after *pax3* manipulation (arrows). (J) *myog* mRNA in oesophagus (red arrowheads), pectoral fin muscle (green arrowheads) and posterior hypaxial muscles (white arrowheads) is reduced in *pax3b* and *pax3a+pax3b* double morphants.



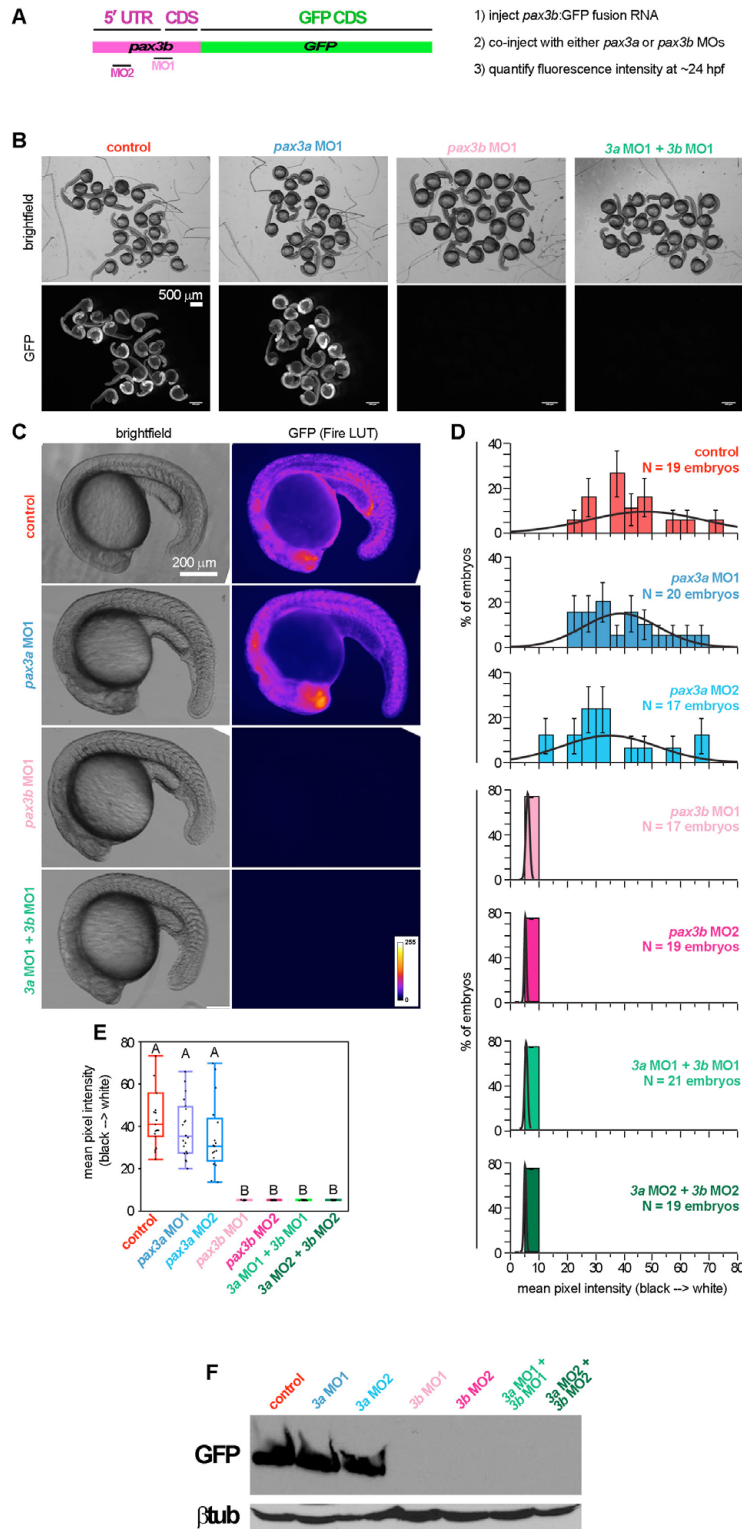

**Fig. S9. *pax3b*, but not *pax3a*, MOs efficiently reduce translation of chimeric 5'UTR*pax3b*:GFP RNA.** (A) Primers (forward with *Xho*I site 5'-gcgctcgagtgcgtggaattacatg-3'; reverse with *Bam*HI site 5'-gcgggatcc gagagtgatggcgcatcat-3') were used to amplify 62 bp of *pax3b* 5'UTR and 48 bp of *pax3b*-coding sequence. The resulting fragment was cloned in frame with EGFP in pEGFP-N1 (Invitrogen) to produce a 5'UTR*pax3b*:eGFP fusion protein. 5'UTR*pax3b*:eGFP was then subcloned into pSP64T, and RNA was transcribed using SP6 (Ambion). RNA (250 pg) was injected alone, or together with MO, into one-cell stage embryos. (B) At 24 hpf, embryos of control (5'UTR*pax3b*:eGFP) and 5'UTR*pax3b*:eGFP plus *pax3a* MO1 or MO2 contained high levels of GFP fluorescence. Embryos with either *pax3b* MO had no detectable fluorescence, indicating complete inhibition of 5'UTR*pax3b*:eGFP translation by *pax3b* MOs. (C) Images of single embryos were taken at identical magnifications and exposure. Background was normalized using the 'Subtract Background' feature of ImageJ (1.47n5). Pixel intensity of 8-bit greyscale images was visualized using the 'Fire' LUT. (D) Mean pixel intensity per embryo was normally distributed. (E) The mean pixel intensities were significantly reduced after addition of *pax3b* MO, as determined by ANOVA and Tukey's post hoc test. (F) Protein lysates were separated by 12% SDS-PAGE and probed using antibodies against GFP or  $\beta$ -tubulin (loading control).

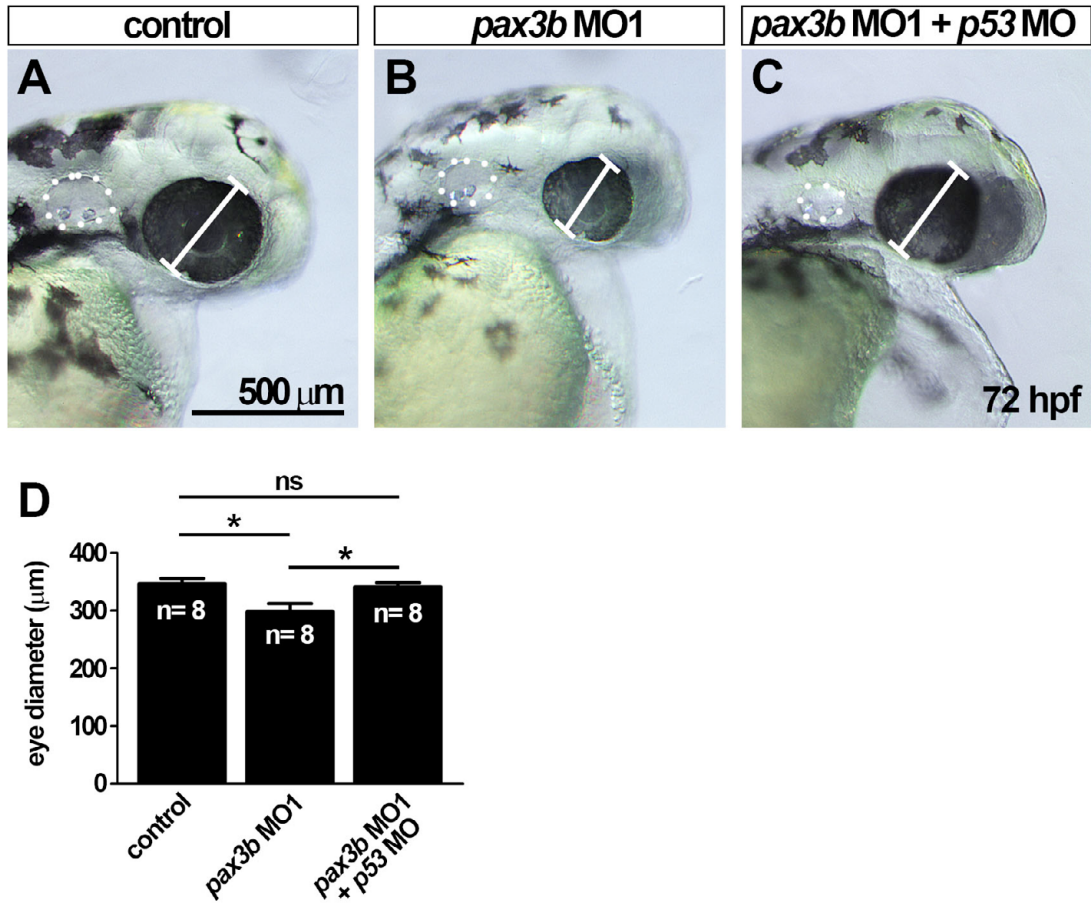

**Fig. S10.** *pax3b* MO1 induces a small eye phenotype that is rescued by co-injection of *p53* morpholino. (A-C) Bright-field images of eye in control (A), *pax3b* MO1-injected (B) and *pax3b* MO1- and *p53* MO-injected (C) larvae at 72 hpf. (D) Quantification of eye diameter reveals injection of *pax3b* MO1 leads to a smaller eye ( $P < 0.05$ ), that is rescued by co-injection of a *p53* MO ( $*P < 0.05$ ). One-way ANOVA followed by a Tukey's post hoc test.



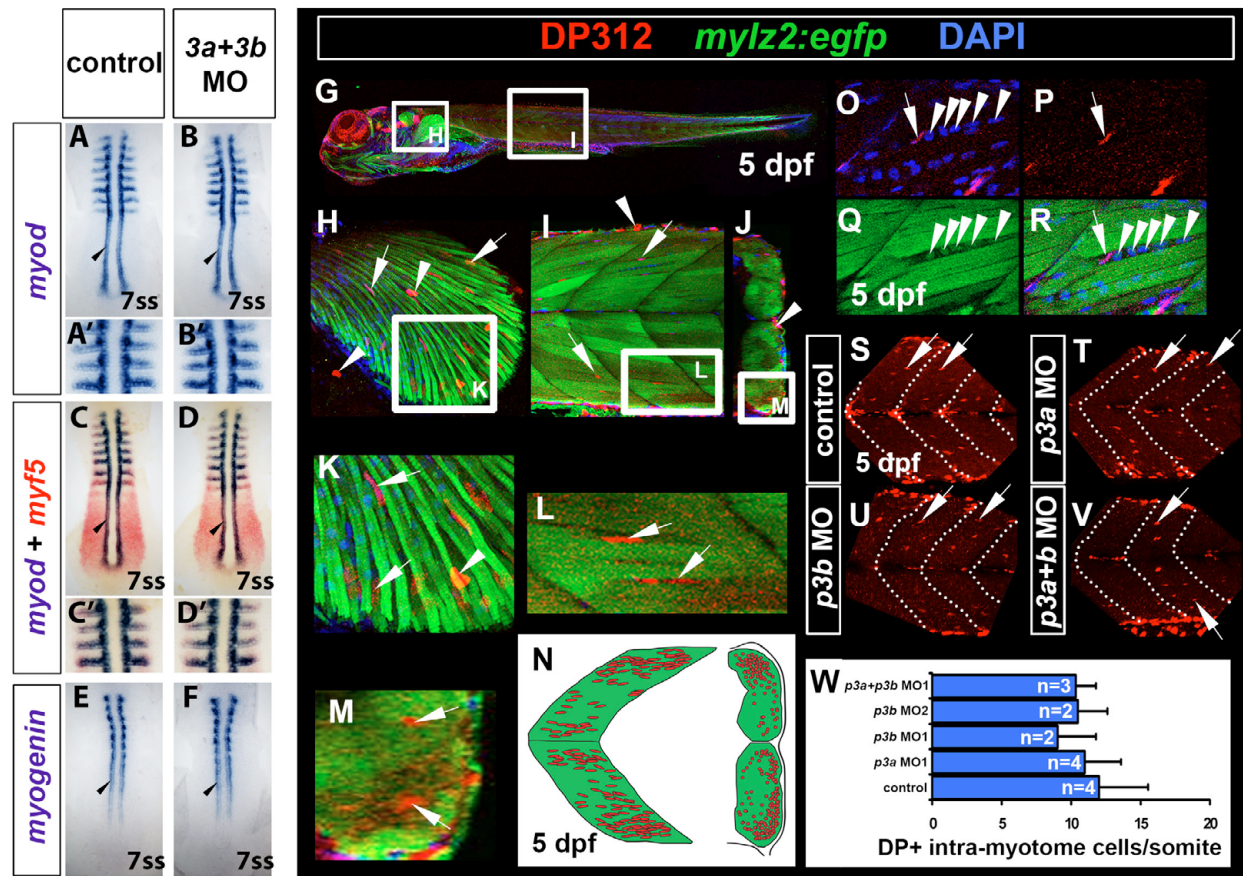

**Fig. S11. Early myogenesis and Pax3/7<sup>+</sup> intra-myotome cells occur normally in *pax3b* morphants.** *In situ* hybridisation of *myod* (A-B'; blue, C-D'), *myf5* (red, C-D') and *myogenin* (E,F). Immunodetection of DP312 (G-M,O-V; red, X,Z) and phospho-histone H3 (H3P) (green, X,Z) in wild-type (A-F,X,Z) and *Tg(myfz2:egfp)* backgrounds. (A-F) Expression of *myod*, *myf5* and *myog* at 7 ss are unaffected in *pax3a+pax3b* double morphants. (G-M) DP312<sup>+</sup> intra-myotome cells (IMCs) localise to inter-fibre regions, reminiscent of Pax7<sup>+</sup> myogenic cells (Seger et al., 2011). (N) IMC location. (O-R) IMCs are likely to be myogenic as they are observed closely juxtaposed to myogenic nuclei (Q,R, arrowheads) during myotube fusion (R). (S-W) Number of IMCs at 5 dpf is unchanged in *pax3a*, *pax3b* and *pax3a+pax3b* double morphants. (X,Y) Cell proliferation of dermomyotome cells (DM), as assessed by faint DP312/H3P<sup>+</sup> nuclei (green, X) is unchanged after *pax3* manipulation (Y). However, total H3P<sup>+</sup> nuclei are significantly increased in *pax3a+pax3b* double morphants (Y) ( $P < 0.0001$ ). (Z) Increase in H3P<sup>+</sup> nuclei occurs in the neural tube. Asterisks indicate neural tube. Arrows indicate H3P<sup>+</sup> nuclei within neural tube. One-way ANOVA and Tukey's post hoc test.

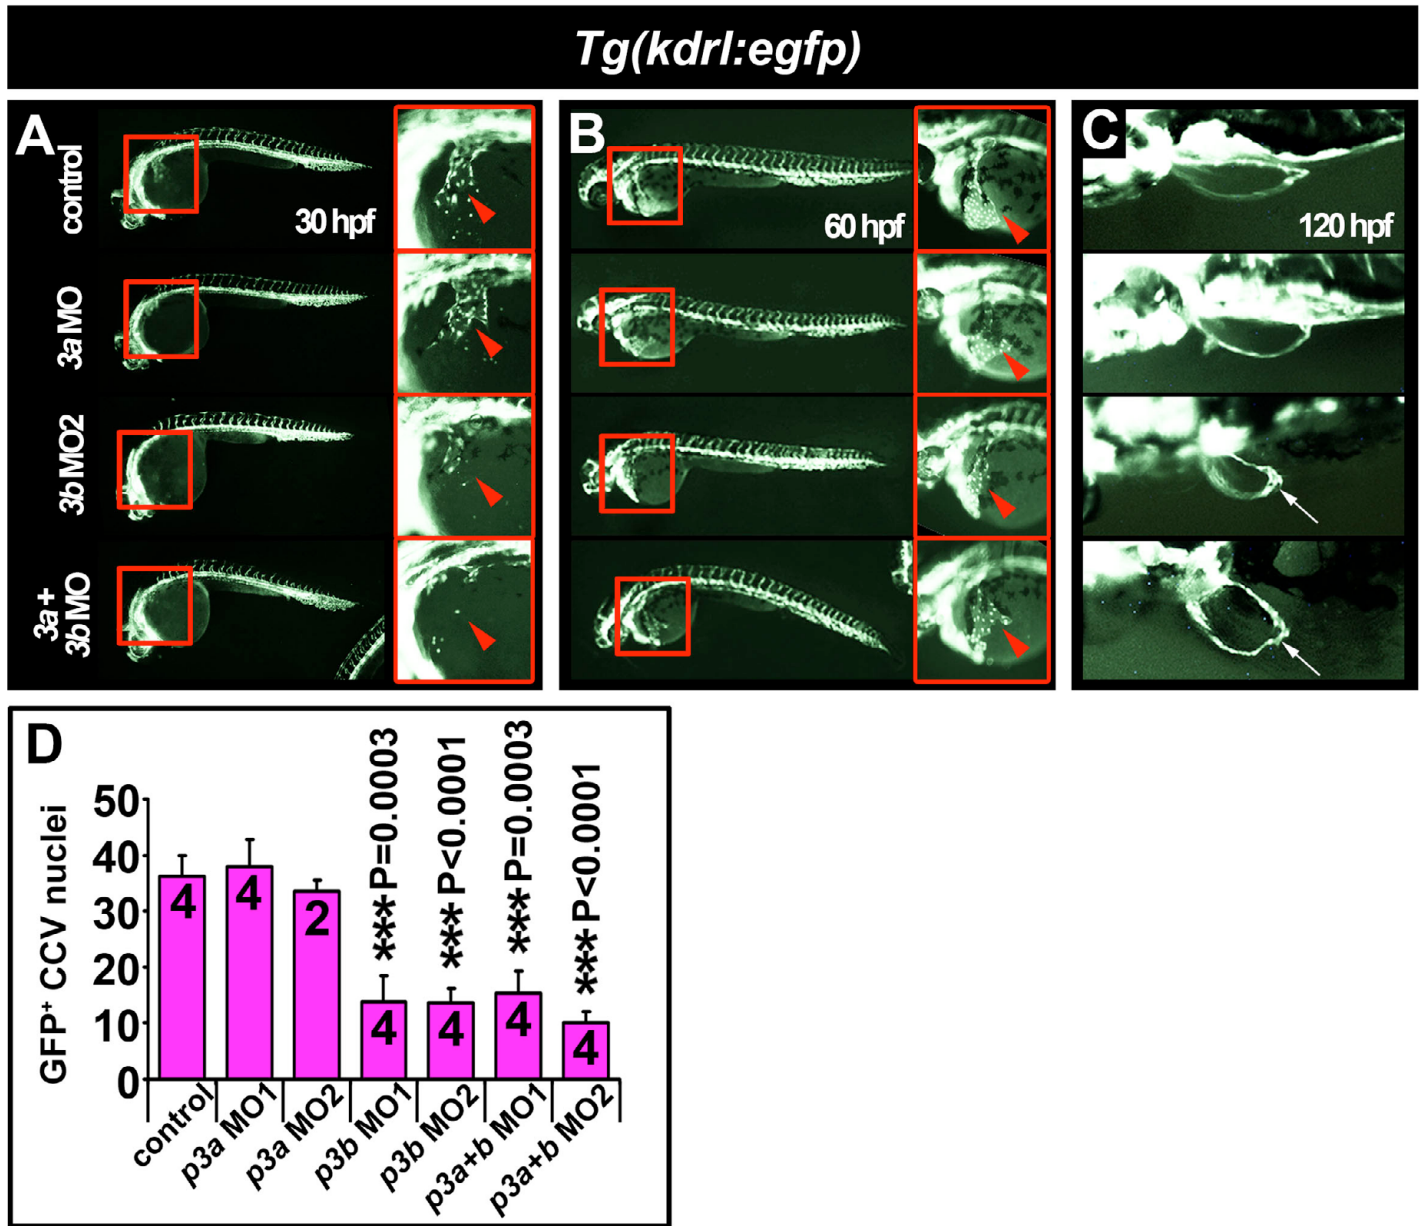

**Fig. S12. Common cardinal vein development is delayed at 30 hpf in *pax3b* morphants.** Fluorescent images of live embryos expressing eGFP under the *kdr1* (formerly known as *flk1* or *vegfr2*) promoter (A-C). Whole-mount lateral (A,B) or dorsal (C) views, anterior towards the left. (A) In 30 hpf embryos, general vasculogenesis was unimpaired after *pax3a/b* knockdown. However, the forming common cardinal vein (CCV) was reduced in *pax3b* single and double *pax3a/b* morphants (arrowheads). Boxed areas indicate regions magnified in the corresponding panels on the right. (B) In 60 hpf larvae, the general integrity of the vascular system was indistinguishable between control and *pax3a/b* morphants. Endothelial cells of the CCV had spread across the yolk (arrowheads). (C) Pectoral fin vasculature developed normally in *pax3a*, *pax3b* and *pax3a+pax3b* double morphants. The pectoral fin is malformed after *pax3b* manipulation (arrows). (D) Quantification of eGFP<sup>+</sup> CCV nuclei at 30 hpf, mean±s.e.m. Sample number is indicated within each bar.



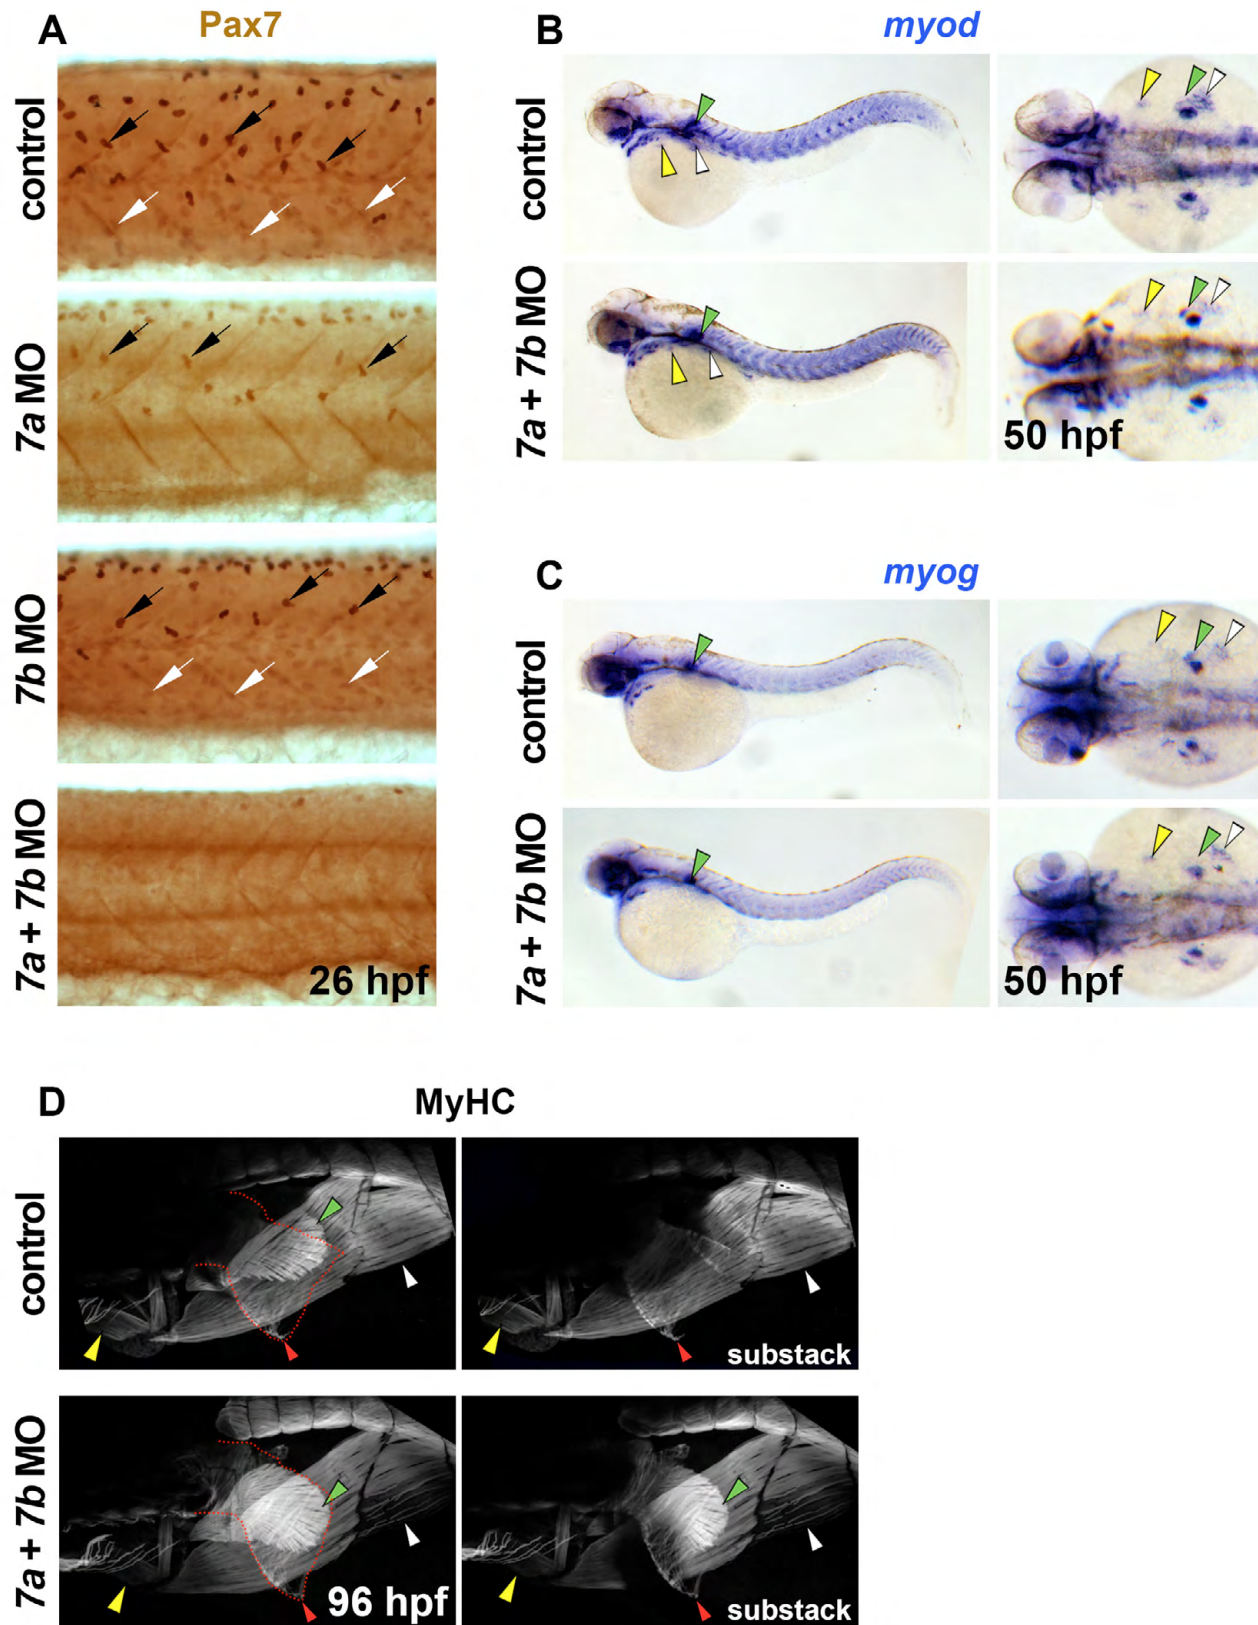

**Fig. S13. Pax7 proteins are not required for MRF gene expression and subsequent hypaxial and oesophageal striated muscle formation.** Immunodetection of Pax7 (A) and sarcomeric MyHC (D) or *in situ* mRNA hybridization for *myod* (B) and *myog* (C). Lateral view wholemounts have anterior towards the left and dorsal towards the top (A-C, left panels; D). Dorsal view wholemounts have anterior towards the left (B and C, right panels). (A) Nuclear Pax7 proteins accumulate weakly in dermomyotome cells (white arrows) and strongly in xanthophores (black arrows) overlying the somites at 26 hpf. Whereas *pax7a* MO diminishes dermomyotomal Pax7, both *pax7a* and *pax7b* MOs are required to remove all immunodetection. (B,C) Injection of dual *pax7a+pax7b* MOs has no discernible effect upon either *myod* (B) or *myog* (C) mRNA accumulation in anterior or posterior hypaxial muscle anlage or pectoral fin at 50 hpf (yellow, white and green arrowheads, respectively). (D) At 96 hpf, sarcomeric MyHC had accumulated in OSM (red markers) and extended caudally in both control and *pax7a+pax7b* morphant animals.

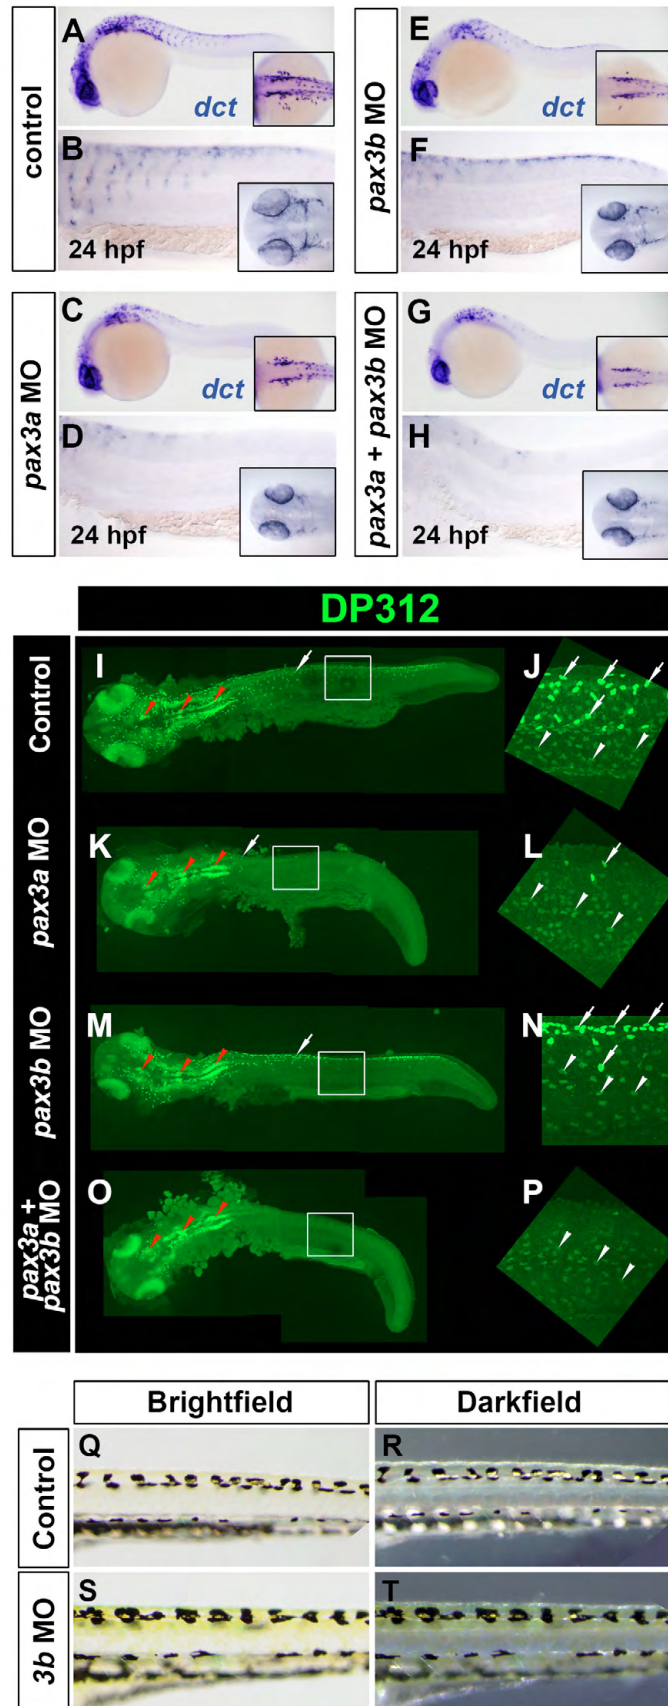

**Fig. S14. Markers of neural crest are still expressed in *pax3b* morphants.** *In situ* mRNA hybridisation of *dct* (A-H) and immunodetection of DP312 (I-O). Lateral view wholemounts are oriented anterior towards the left and dorsal towards the top (A-P); insets in A,C,E,G are wholemount dorsal views with anterior towards the left. Insets in B,D,F,H are dorsal views with anterior towards the left. (A-H) *dct* expression in melanoblasts is reduced in *pax3a* single and *pax3a+pax3b* double morphants (Minchin and Hughes, 2008), but *pax3b* morphants are similar to controls. (I-P) Intensely labelled DP312+ cells corresponding to xanthophores are still present in *pax3b* morphants (L). (Q-T) At 5 dpf, pigmentation is grossly normal in *pax3b* morphants.



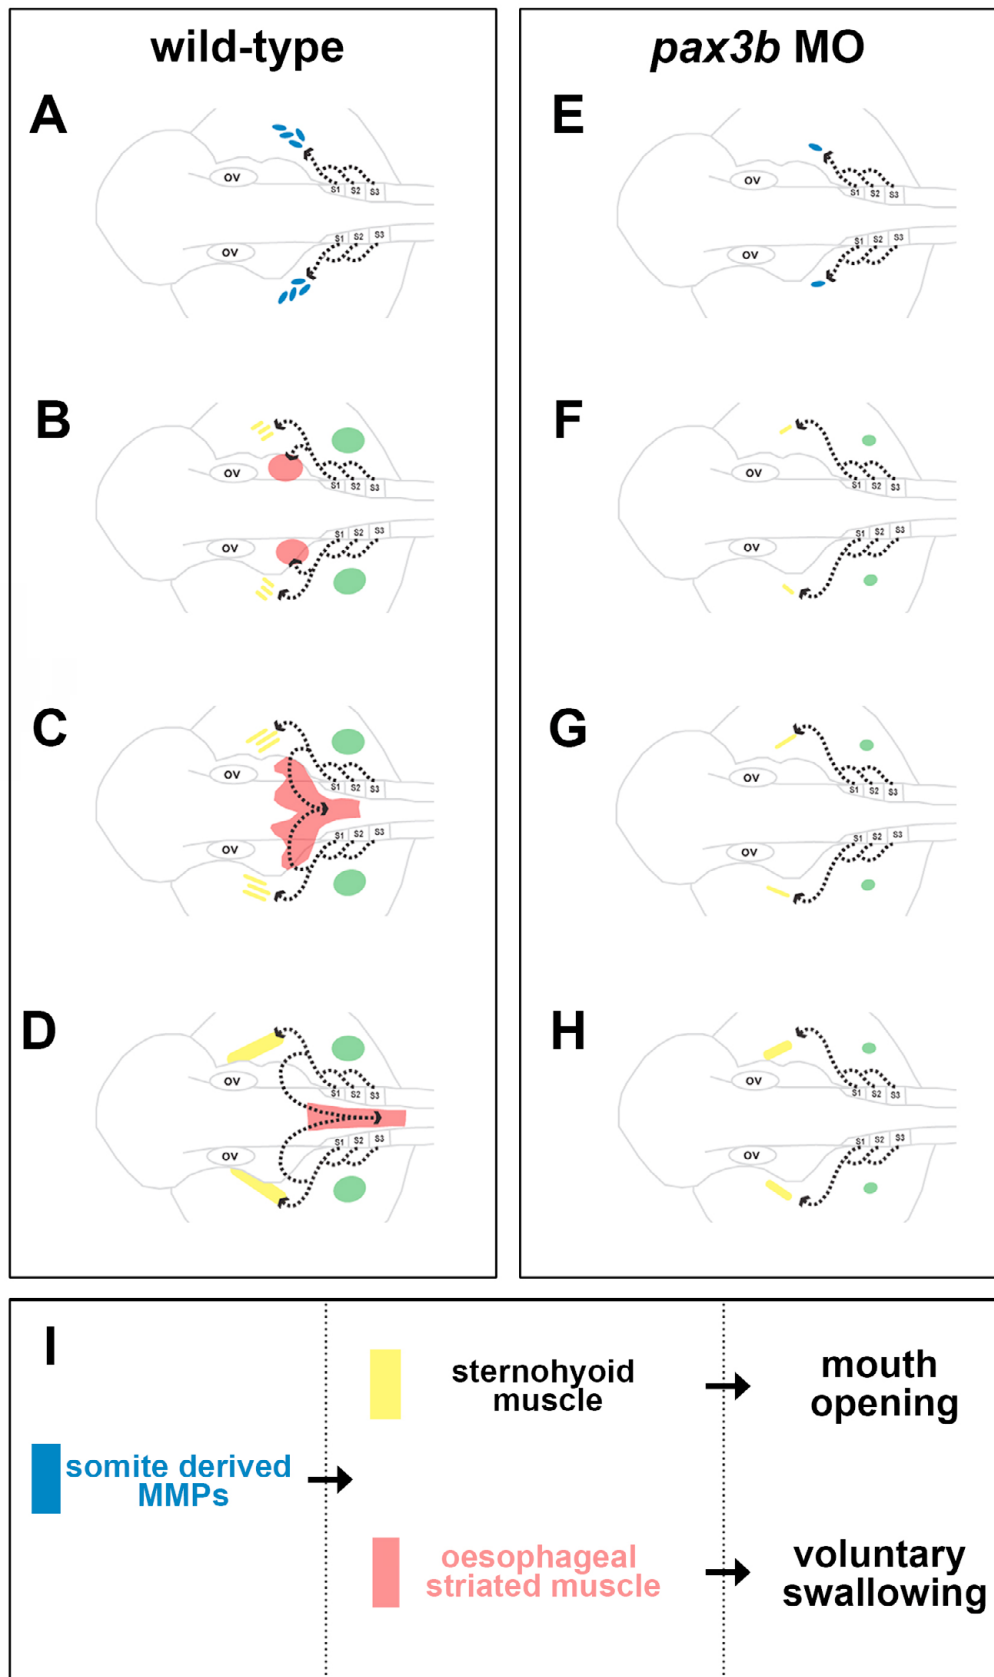

**Fig. S15. Schematic of *pax3b*-dependent formation of OSM from migratory somite cells in zebrafish. (A-I)** Model for migration of sternohyoideus and OSM precursors. MMPs migrate in a single stream from somites 1-3 (blue, A). Prior to 36 hpf, OSM precursors migrate medially to the oesophagus and begin expression of *myf5* (red, B). SHM precursors continue their rostral migration and SHM differentiation begins (yellow, B). Pectoral fin muscle begins to differentiate (green, B). It is unclear whether PFM precursors migrate along the same pathway as SHM and OSM. Bilateral *myf5*+ clusters begin to move medially and form an ‘inverse fountain’ (C). Differentiation of OSM is evident at the most posterior point (red, C). Migration of OSM is complete by 72 hpf, and differentiation is under way (red, D). Migration of MMPs (E), and differentiation of OSM, SHM and PFM are reduced in *pax3b* morphants (F-H).

Table S1.

| Figure number and panel | Assay                         | Genotype/treatment                                                             | Sample number         | % embryos affected                                                                           |
|-------------------------|-------------------------------|--------------------------------------------------------------------------------|-----------------------|----------------------------------------------------------------------------------------------|
| Fig4A                   | <i>myog</i> ISH, 72hpf        | <i>myf5</i> +/ <i>hu2022</i> incross:<br>sibling and <i>myf5</i> <i>hu2022</i> | n=42                  | 42/42 (100%)-normal <i>myog</i> in OSM                                                       |
| Fig4A                   | <i>mylz2</i> ISH, 120hpf      | <i>myf5</i> +/ <i>hu2022</i> incross:<br>sibling and <i>myf5</i> <i>hu2022</i> | n=39                  | 39/39 (100%)-normal <i>mylz2</i> in OSM                                                      |
| Fig4B                   | MF20 (MyHC);Myh11 IHC, 120hpf | sibling and <i>myf5</i> <i>hu2022</i>                                          | n=35                  | 35/35 (100%) normal for Myh11;MyHC in OSM                                                    |
| Fig4B                   | MF20 (MyHC);Myh11 IHC, 120hpf | sibling and <i>myf5</i> <i>hu2022</i>                                          | 48/59                 | 48/48 (100%) normal for Myh11;MyHC in OSM                                                    |
| Fig4B                   | MF20 (MyHC);Myh11 IHC, 120hpf | <i>myodfh261</i>                                                               | 7/59                  | 7/7(100%) normal for Myh11;No MyHC in OSM                                                    |
| Fig4B                   | MF20 (MyHC);Myh11 IHC, 120hpf | <i>myf5</i> <i>hu2022</i> ; <i>myodfh261</i>                                   | 4/59                  | 4/4(100%) normal for Myh11No MyHC in OSM                                                     |
| Fig4 (data not shown)   | MF20 (MyHC);Myh11 IHC, 120hpf | control                                                                        | n=20                  | 20/20 (100%) normal for Myh11;MyHC in OSM                                                    |
| Fig4 (data not shown)   | MF20 (MyHC);Myh11 IHC, 120hpf | <i>myod</i> MO                                                                 | n=37                  | 33/37(89%)normal for Myh11;No MyHC in OSM                                                    |
| Fig4C                   | <i>myog</i> ISH, 72hpf        | <i>myod</i> +/ <i>fh261</i> incross:<br>sibling<br><i>myodfh261</i>            | n=25<br>20/25<br>5/25 | 25/25 (100%)- normal <i>myog</i> in OSM<br>5/5 (100%)-no <i>myog</i> in OSM                  |
| Fig4D                   | <i>myog</i> ISH, 72hpf        | control<br><i>myod</i> MO                                                      | n=15<br>n=37          | 15/15 (100%)- normal <i>myog</i> in OSM<br>37/37 (100%)-reduced or absent <i>myog</i> in OSM |
| Fig5K-K"                | <i>lhx2</i> ISH, 24hpf        | control                                                                        | n=38                  | 38/38 (100%)-normal <i>lhx2</i> in migrating muscle precursors                               |
| Fig5M-M"                | <i>lhx2</i> ISH, 24hpf        | <i>pax3b</i> MO1                                                               | n=45                  | 32/45 (71%)-reduced or absent <i>lhx2</i> in migrating muscle precursors                     |
| Fig5 (data not shown)   | <i>lhx2</i> ISH, 24hpf        | <i>pax3b</i> MO2                                                               | n=59                  | 46/59 (78%)-reduced or absent <i>lhx2</i> in migrating muscle precursors                     |
| Fig5L-L"                | <i>lhx2</i> ISH, 24hpf        | <i>pax3a</i> MO1                                                               | n=40                  | 38/40 (95%)-normal <i>lhx2</i> in migrating muscle precursors                                |
| Fig5 (data not shown)   | <i>lhx2</i> ISH, 24hpf        | <i>pax3a</i> MO2                                                               | n=56                  | 50/56 (89%)-normal <i>lhx2</i> in migrating muscle precursors                                |
| Fig5N-N"                | <i>lhx2</i> ISH, 24hpf        | <i>pax3a</i> MO1 + <i>pax3b</i> MO1                                            | n=66                  | 55/66 (83%)-reduced or absent <i>lhx2</i> in migrating muscle precursors                     |
| Fig5 (data not shown)   | <i>lhx2</i> ISH, 24hpf        | <i>pax3b</i> MO2 + <i>pax3b</i> MO2                                            | n=77                  | 68/77 (88%)-reduced or absent <i>lhx2</i> in migrating muscle precursors                     |
| Fig6A                   | <i>myf5</i> ISH, 50hpf        | control                                                                        | n=23                  | 23/23 (100%)-normal 'inverse <i>myf5</i> fountain'                                           |
| Fig6B                   | <i>myf5</i> ISH, 50hpf        | <i>pax3b</i> MO1                                                               | n=37                  | 20/23 (87%)-absent 'inverse <i>myf5</i> fountain'                                            |
| Fig6C                   | <i>myf5</i> ISH, 50hpf        | <i>pax3a</i> MO1                                                               | n=25                  | 25/25 (100%)-normal 'inverse <i>myf5</i> fountain'                                           |
| Fig6D                   | <i>myf5</i> ISH, 50hpf        | <i>pax3a</i> MO1 + <i>pax3b</i> MO1                                            | n=26                  | 18/23 (78%)-absent 'inverse <i>myf5</i> fountain'                                            |
| Fig6E,E'                | <i>myogenin</i> ISH, 53hpf    | control                                                                        | n=82                  | 82/82 (100%)-normal <i>myog</i> in OSM                                                       |
| Fig6 (data not shown)   | <i>myogenin</i> ISH, 53hpf    | <i>pax3b</i> MO1                                                               | n=76                  | 63/76 (82%)- <i>myog</i> reduced or absent in OSM                                            |
| Fig6G,G'                | <i>myogenin</i> ISH, 53hpf    | <i>pax3b</i> MO2                                                               | n=93                  | 85/93 (91%)- <i>myog</i> reduced or absent in OSM                                            |
| Fig6F,F'                | <i>myogenin</i> ISH, 53hpf    | <i>pax3a</i> MO1                                                               | n=72                  | 70/72 (97%)-normal <i>myog</i> in OSM                                                        |
| Fig6 (data not shown)   | <i>myogenin</i> ISH, 53hpf    | <i>pax3a</i> MO2                                                               | n=132                 | 126/132 (95%)-normal <i>myog</i> in OSM                                                      |



|                                                                                                             |                                                                                                                                                                                                                      |                                                                                                                                                                       |                                                      |                                                                                                                                                                                                                                                                                                                                                          |
|-------------------------------------------------------------------------------------------------------------|----------------------------------------------------------------------------------------------------------------------------------------------------------------------------------------------------------------------|-----------------------------------------------------------------------------------------------------------------------------------------------------------------------|------------------------------------------------------|----------------------------------------------------------------------------------------------------------------------------------------------------------------------------------------------------------------------------------------------------------------------------------------------------------------------------------------------------------|
| Fig6 (data not shown)<br>Fig6H,H'                                                                           | <i>myogenin</i> ISH, 53hpf<br><i>myogenin</i> ISH, 53hpf                                                                                                                                                             | <i>pax3a</i> MO1 + <i>pax3b</i> MO1<br><i>pax3b</i> MO2 + <i>pax3b</i> MO2                                                                                            | n=80<br>n=96                                         | 60/80 (75%)- <i>myog</i> reduced or absent in OSM<br>81/96 (84%)- <i>myog</i> reduced or absent in OSM                                                                                                                                                                                                                                                   |
| Fig6E,E'<br>Fig6 (data not shown)<br>Fig6G,G'<br>Fig6F,F'                                                   | <i>myogenin</i> ISH, 53hpf<br><i>myogenin</i> ISH, 53hpf<br><i>myogenin</i> ISH, 53hpf<br><i>myogenin</i> ISH, 53hpf                                                                                                 | control<br><i>pax3b</i> MO1<br><i>pax3b</i> MO2<br><i>pax3a</i> MO1                                                                                                   | n=82<br>n=76<br>n=93<br>n=72                         | 82/82 (100%)-normal <i>myog</i> in SHM/PFM and PHM<br>66/76 (86%)-reduced or absent <i>myog</i> in SHM/PFM and PHM<br>71/93 (76%)-reduced or absent <i>myog</i> in SHM/PFM and PHM<br>68/72 (94%)-normal <i>myog</i> in SHM/PFM and PHM                                                                                                                  |
| Fig6 (data not shown)<br>Fig6 (data not shown)<br>Fig6H,H'                                                  | <i>myogenin</i> ISH, 53hpf<br><i>myogenin</i> ISH, 53hpf<br><i>myogenin</i> ISH, 53hpf                                                                                                                               | <i>pax3a</i> MO2<br><i>pax3a</i> MO1 + <i>pax3b</i> MO1<br><i>pax3b</i> MO2 + <i>pax3b</i> MO2                                                                        | n=132<br>n=80<br>n=96                                | 120/132 (91%)-normal <i>myog</i> in SHM/PFM and PHM<br>67/80 (84%)-reduced or absent <i>myog</i> in SHM/PFM and PHM<br>75/96 (78%)-reduced or absent <i>myog</i> in SHM/PFM and PHM                                                                                                                                                                      |
| Fig6I<br>Fig6K<br>Fig6 (data not shown)<br>Fig6J<br>Fig6 (data not shown)<br>Fig6L<br>Fig6 (data not shown) | MF20 (MyHC) IHC, 96hpf<br>MF20 (MyHC) IHC, 96hpf                                   | control<br><i>pax3b</i> MO1<br><i>pax3b</i> MO2<br><i>pax3a</i> MO1<br><i>pax3a</i> MO2<br><i>pax3a</i> MO1 + <i>pax3b</i> MO1<br><i>pax3b</i> MO2 + <i>pax3b</i> MO2 | n=35<br>n=52<br>n=28<br>n=45<br>n=58<br>n=34<br>n=21 | 35/35 (100%)-normal MyHC in OSM<br>40/52 (77%)-reduced MyHC in OSM<br>20/28 (71%)-reduced MyHC in OSM<br>45/45 (100%)-normal MyHC in OSM<br>58/58 (100%)-normal MyHC in OSM<br>30/34 (88%)-reduced MyHC in OSM<br>17/21 (81%)-reduced MyHC in OSM                                                                                                        |
| Fig6M<br>Fig6O<br>Fig6 (data not shown)<br>Fig6N<br>Fig6 (data not shown)<br>Fig6P<br>Fig6 (data not shown) | MF20 (MyHC) IHC, 96hpf<br>MF20 (MyHC) IHC, 96hpf                                   | control<br><i>pax3b</i> MO1<br><i>pax3b</i> MO2<br><i>pax3a</i> MO1<br><i>pax3a</i> MO2<br><i>pax3a</i> MO1 + <i>pax3b</i> MO1<br><i>pax3b</i> MO2 + <i>pax3b</i> MO2 | n=35<br>n=52<br>n=28<br>n=45<br>n=58<br>n=34<br>n=21 | 35/35 (100%)-normal MyHC in TV<br>52/52 (100%)-normal MyHC in TV<br>28/28 (100%)-normal MyHC in TV<br>45/45 (100%)-normal MyHC in TV<br>58/58 (100%)-normal MyHC in TV<br>34/34 (100%)-normal MyHC in TV<br>21/21 (100%)-normal MyHC in TV                                                                                                               |
| Fig6S                                                                                                       | Myh11 IHC, 96hpf                                                                                                                                                                                                     | control                                                                                                                                                               | n=22                                                 | 22/22 (100%)-normal smooth Myosin in GIT                                                                                                                                                                                                                                                                                                                 |
| Fig6 (data not shown)<br>Fig6T<br>Fig6 (data not shown)<br>Fig6V<br>Fig6 (data not shown)                   | Myh11 IHC, 96hpf<br>Myh11 IHC, 96hpf<br>Myh11 IHC, 96hpf<br>Myh11 IHC, 96hpf<br>Myh11 IHC, 96hpf                                                                                                                     | <i>pax3b</i> MO2<br><i>pax3a</i> MO1<br><i>pax3a</i> MO2<br><i>pax3a</i> MO1 + <i>pax3b</i> MO1<br><i>pax3b</i> MO2 + <i>pax3b</i> MO2                                | n=20<br>n=39<br>n=21<br>n=25<br>n=26                 | 20/20 (100%)-normal smooth Myosin in GIT<br>39/39 (100%)-normal smooth Myosin in GIT<br>21/21 (100%)-normal smooth Myosin in GIT<br>25/25 (100%)-normal smooth Myosin in GIT<br>26/26 (100%)-normal smooth Myosin in GIT                                                                                                                                 |
| Fig7A<br>Fig7A<br>Fig7 (data not shown)<br>Fig7A<br>Fig7 (data not shown)<br>Fig7A                          | Tg( <i>actc1b:egfp</i> ), 120hpf<br>Tg( <i>actc1b:egfp</i> ), 120hpf | control<br><i>pax3b</i> MO1<br><i>pax3b</i> MO2<br><i>pax3a</i> MO1<br><i>pax3a</i> MO2<br><i>pax3a</i> MO1 + <i>pax3b</i> MO1                                        | n=179<br>n=126<br>n=73<br>n=55<br>n=34<br>n=79       | 179/179 (100%)-normal Gfp in SHM/PFM and PHM<br>101/126 (80%)-both mild and severely reduced Gfp in SHM/PFM and PHM<br>55/73 (75%)-both mild and severely reduced Gfp in SHM/PFM and PHM<br>54/55 (98%)-normal Gfp in SHM/PFM and PHM<br>34/34 (100%)-normal Gfp in SHM/PFM and PHM<br>59/79 (73%)-both mild and severely reduced Gfp in SHM/PFM and PHM |

|                              |                                    |                                     |       |                                                                               |
|------------------------------|------------------------------------|-------------------------------------|-------|-------------------------------------------------------------------------------|
| Fig7H                        | microspheres, 120hpf               | <i>control</i>                      | n=38  | 38/38 (100%)-normal quantity of internalised microspheres                     |
| Fig7H                        | microspheres, 120hpf               | <i>pax3b</i> MO1                    | n=53  | 48/53 (91%)-reduced internalised microspheres                                 |
| Fig7H                        | microspheres, 120hpf               | <i>pax3a</i> MO1                    | n=27  | 27/27 (100%)-normal quantity of internalised microspheres                     |
| Fig7H                        | microspheres, 120hpf               | <i>pax3a</i> MO1 + <i>pax3b</i> MO1 | n=44  | 42/44 (95%)-reduced internalised microspheres                                 |
| Suppl. Fig8E,E'              | DP312 IHC, 7ss                     | <i>control</i>                      | n=25  | 25/25 (100%)-normal DP312 reactivity                                          |
| Suppl. Fig8F                 | DP312 IHC, 7ss                     | <i>pax3a</i> MO1                    | n=35  | 33/35 (94%)-absent DP312 reactivity in <i>pax3a</i> regions                   |
| Suppl. Fig8 (data not shown) | DP312 IHC, 7ss                     | <i>pax3a</i> MO2                    | n=22  | 19/22 (86%)-absent DP312 reactivity in <i>pax3a</i> regions                   |
| Suppl. Fig8G                 | DP312 IHC, 7ss                     | <i>pax3b</i> MO1                    | n=116 | 116/116 (100%)-normal DP312 reactivity                                        |
| Suppl. Fig8 (data not shown) | DP312 IHC, 7ss                     | <i>pax3b</i> MO2                    | n=136 | 136/136 (100%)-normal DP312 reactivity                                        |
| Suppl. Fig8H                 | DP312 IHC, 7ss                     | <i>pax3a</i> MO1 + <i>pax3b</i> MO1 | n=87  | 78/87 (89%)-absent DP312 reactivity in <i>pax3a</i> and <i>pax3b</i> regions  |
| Suppl. Fig8 (data not shown) | DP312 IHC, 7ss                     | <i>pax3b</i> MO2 + <i>pax3b</i> MO2 | n=102 | 82/102 (78%)-absent DP312 reactivity in <i>pax3a</i> and <i>pax3b</i> regions |
| Suppl. Fig8I                 | <i>transgelin</i> ISH, 96hpf       | <i>control</i>                      | n=19  | 19/19 (100%)-normal <i>transgelin</i> in GIT                                  |
| Suppl. Fig8I                 | <i>transgelin</i> ISH, 96hpf       | <i>pax3b</i> MO1                    | n=30  | 30/30 (100%)-normal <i>transgelin</i> in GIT                                  |
| Suppl. Fig8 (data not shown) | <i>transgelin</i> ISH, 96hpf       | <i>pax3b</i> MO2                    | n=27  | 27/27 (100%)-normal <i>transgelin</i> in GIT                                  |
| Suppl. Fig8I                 | <i>transgelin</i> ISH, 96hpf       | <i>pax3a</i> MO1                    | n=24  | 24/24 (100%)-normal <i>transgelin</i> in GIT                                  |
| Suppl. Fig8 (data not shown) | <i>transgelin</i> ISH, 96hpf       | <i>pax3a</i> MO2                    | n=17  | 17/17 (100%)-normal <i>transgelin</i> in GIT                                  |
| Suppl. Fig8I                 | <i>transgelin</i> ISH, 96hpf       | <i>pax3a</i> MO1 + <i>pax3b</i> MO1 | n=20  | 20/20 (100%)-normal <i>transgelin</i> in GIT                                  |
| Suppl. Fig8 (data not shown) | <i>transgelin</i> ISH, 96hpf       | <i>pax3b</i> MO2 + <i>pax3b</i> MO2 | n=29  | 29/29 (100%)-normal <i>transgelin</i> in GIT                                  |
| Suppl. Fig8J                 | <i>myogenin</i> ISH, 53hpf         | <i>control</i>                      | n=82  | 82/82 (100%)-normal <i>myog</i> in OSM                                        |
| Suppl. Fig8 (data not shown) | <i>myogenin</i> ISH, 53hpf         | <i>pax3b</i> MO1                    | n=76  | 63/76 (82%)- <i>myog</i> reduced or absent in OSM                             |
| Suppl. Fig8J                 | <i>myogenin</i> ISH, 53hpf         | <i>pax3b</i> MO2                    | n=93  | 85/93 (91%)- <i>myog</i> reduced or absent in OSM                             |
| Suppl. Fig8J                 | <i>myogenin</i> ISH, 53hpf         | <i>pax3a</i> MO1                    | n=72  | 70/72 (97%)-normal <i>myog</i> in OSM                                         |
| Suppl. Fig8 (data not shown) | <i>myogenin</i> ISH, 53hpf         | <i>pax3a</i> MO2                    | n=132 | 126/132 (95%)-normal <i>myog</i> in OSM                                       |
| Suppl. Fig8 (data not shown) | <i>myogenin</i> ISH, 53hpf         | <i>pax3a</i> MO1 + <i>pax3b</i> MO1 | n=80  | 60/80 (75%)- <i>myog</i> reduced or absent in OSM                             |
| Suppl. Fig8J                 | <i>myogenin</i> ISH, 53hpf         | <i>pax3b</i> MO2 + <i>pax3b</i> MO2 | n=96  | 81/96 (84%)- <i>myog</i> reduced or absent in OSM                             |
| Suppl. Fig10A                | brightfield, 72hpf                 | <i>control</i>                      | n=15  | 15/15 (100%)-normal eye size                                                  |
| Suppl. Fig10B                | brightfield, 72hpf                 | <i>pax3b</i> MO1                    | n=24  | 20/24 (83%)-small eye size                                                    |
| Suppl. Fig10C                | brightfield, 72hpf                 | <i>pax3b</i> MO1 + p53 MO           | n=31  | 20/31 (65%)-normal eye size                                                   |
| Suppl. Fig11A                | <i>myod</i> ISH, 7ss               | <i>control</i>                      | n=15  |                                                                               |
| Suppl. Fig11B                | <i>myod</i> ISH, 7ss               | <i>pax3a</i> MO1 + <i>pax3b</i> MO1 | n=23  |                                                                               |
| Suppl. Fig11C                | <i>myod</i> + <i>myf5</i> ISH, 7ss | <i>control</i>                      | n=24  |                                                                               |
| Suppl. Fig11D                | <i>myod</i> + <i>myf5</i> ISH, 7ss | <i>pax3a</i> MO1 + <i>pax3b</i> MO1 | n=25  |                                                                               |
| Suppl. Fig11C                | <i>myog</i> ISH, 7ss               | <i>control</i>                      | n=26  |                                                                               |



|                               |                                |                                     |      |                                                                                                             |
|-------------------------------|--------------------------------|-------------------------------------|------|-------------------------------------------------------------------------------------------------------------|
| Suppl. Fig11D                 | <i>myog</i> ISH, 7ss           | <i>pax3a</i> MO1 + <i>pax3b</i> MO1 | n=19 |                                                                                                             |
| Suppl. Fig11S                 | DP312 IHC, 5dpf                | control                             | n=22 |                                                                                                             |
| Suppl. Fig11T                 | DP312 IHC, 5dpf                | <i>pax3a</i> MO1                    | n=27 |                                                                                                             |
| Suppl. Fig11U                 | DP312 IHC, 5dpf                | <i>pax3b</i> MO2                    | n=20 |                                                                                                             |
| Suppl. Fig11V                 | DP312 IHC, 5dpf                | <i>pax3a</i> MO1 + <i>pax3b</i> MO1 | n=21 |                                                                                                             |
| Suppl. Fig11X                 | DP312 + H3P IHC, 53hpf         | control                             | n=25 |                                                                                                             |
| Suppl. Fig11X                 | DP312 + H3P IHC, 53hpf         | <i>pax3b</i> MO2                    | n=31 |                                                                                                             |
| Suppl. Fig11X                 | DP312 + H3P IHC, 53hpf         | <i>pax3a</i> MO1 + <i>pax3b</i> MO1 | n=38 |                                                                                                             |
| Suppl. Fig12A                 | Tg( <i>kdr1:egfp</i> ), 30hpf  | control                             | n=27 | 27/27 (100%)-normal Gfp+ CCV endothelial cells                                                              |
| Suppl. Fig12 (data not shown) | Tg( <i>kdr1:egfp</i> ), 30hpf  | <i>pax3a</i> MO1                    | n=23 | 23/23 (100%)-normal Gfp+ CCV endothelial cells                                                              |
| Suppl. Fig12 (data not shown) | Tg( <i>kdr1:egfp</i> ), 30hpf  | <i>pax3b</i> MO1                    | n=29 | 22/29 (76%)-reduced or absent Gfp+ CCV endothelial cells                                                    |
| Suppl. Fig12A                 | Tg( <i>kdr1:egfp</i> ), 30hpf  | <i>pax3b</i> MO2                    | n=35 | 31/35 (89%)-reduced or absent Gfp+ CCV endothelial cells                                                    |
| Suppl. Fig12 (data not shown) | Tg( <i>kdr1:egfp</i> ), 30hpf  | <i>pax3a</i> MO1 + <i>pax3b</i> MO1 | n=29 | 25/29 (86%)-reduced or absent Gfp+ CCV endothelial cells                                                    |
| Suppl. Fig12A                 | Tg( <i>kdr1:egfp</i> ), 30hpf  | <i>pax3b</i> MO2 + <i>pax3b</i> MO2 | n=26 | 25/26 (96%)-reduced or absent Gfp+ CCV endothelial cells                                                    |
| Suppl. Fig12B                 | Tg( <i>kdr1:egfp</i> ), 60hpf  | control                             | n=27 | 27/27 (100%)-normal Gfp+ CCV endothelial cells                                                              |
| Suppl. Fig12 (data not shown) | Tg( <i>kdr1:egfp</i> ), 60hpf  | <i>pax3a</i> MO1                    | n=23 | 23/23 (100%)-normal Gfp+ CCV endothelial cells                                                              |
| Suppl. Fig12B                 | Tg( <i>kdr1:egfp</i> ), 60hpf  | <i>pax3a</i> MO2                    | n=34 | 34/34 (100%)-normal Gfp+ CCV endothelial cells                                                              |
| Suppl. Fig12 (data not shown) | Tg( <i>kdr1:egfp</i> ), 60hpf  | <i>pax3b</i> MO1                    | n=29 | 25/29 (86%)-normal Gfp+ CCV endothelial cells                                                               |
| Suppl. Fig12B                 | Tg( <i>kdr1:egfp</i> ), 60hpf  | <i>pax3b</i> MO2                    | n=35 | 33/35 (94%)-normal Gfp+ CCV endothelial cells                                                               |
| Suppl. Fig12 (data not shown) | Tg( <i>kdr1:egfp</i> ), 60hpf  | <i>pax3a</i> MO1 + <i>pax3b</i> MO1 | n=29 | 28/29 (97%)-normal Gfp+ CCV endothelial cells                                                               |
| Suppl. Fig12B                 | Tg( <i>kdr1:egfp</i> ), 60hpf  | <i>pax3b</i> MO2 + <i>pax3b</i> MO2 | n=26 | 23/26 (88%)-normal Gfp+ CCV endothelial cells                                                               |
| Suppl. Fig12C                 | Tg( <i>kdr1:egfp</i> ), 120hpf | control                             | n=27 | 27/27 (100%)-normal Gfp+ PFV endothelial cells                                                              |
| Suppl. Fig12 (data not shown) | Tg( <i>kdr1:egfp</i> ), 120hpf | <i>pax3a</i> MO1                    | n=23 | 23/23 (100%)-normal Gfp+ PFV endothelial cells                                                              |
| Suppl. Fig12C                 | Tg( <i>kdr1:egfp</i> ), 120hpf | <i>pax3a</i> MO2                    | n=34 | 34/34 (100%)-normal Gfp+ PFV endothelial cells                                                              |
| Suppl. Fig12 (data not shown) | Tg( <i>kdr1:egfp</i> ), 120hpf | <i>pax3b</i> MO1                    | n=29 | 29/29 (100%)-normal Gfp+ PFV endothelial cells                                                              |
| Suppl. Fig12C                 | Tg( <i>kdr1:egfp</i> ), 120hpf | <i>pax3b</i> MO2                    | n=35 | 35/35 (100%)-normal Gfp+ PFV endothelial cells                                                              |
| Suppl. Fig12 (data not shown) | Tg( <i>kdr1:egfp</i> ), 120hpf | <i>pax3a</i> MO1 + <i>pax3b</i> MO1 | n=29 | 29/29 (100%)-normal Gfp+ PFV endothelial cells                                                              |
| Suppl. Fig12C                 | Tg( <i>kdr1:egfp</i> ), 120hpf | <i>pax3b</i> MO2 + <i>pax3b</i> MO2 | n=26 | 26/26 (100%)-normal Gfp+ PFV endothelial cells                                                              |
| Suppl. Fig13A                 | Pax7 IHC, 26hpf                | control                             | n=12 | 12/12 (100%)-normal Pax7 protein in xanthophores (intense stain) and dermomyotome (weak stain)              |
| Suppl. Fig13A                 | Pax7 IHC, 26hpf                | <i>pax7a</i> MO                     | n=15 | 15/15 (100%)-weak Pax7 protein in dermomyotome (weak stain) and reduced xanthophores nuclei (intense stain) |
| Suppl. Fig13A                 | Pax7 IHC, 26hpf                | <i>pax7b</i> MO                     | n=21 | 21/21 (100%)-normal Pax7 protein in xanthophores (intense stain) and                                        |

|                 |                       |                                     |      |                                                                                                                            |
|-----------------|-----------------------|-------------------------------------|------|----------------------------------------------------------------------------------------------------------------------------|
| Suppl. Fig13A   | Pax7 IHC, 26hpf       | <i>pax7a+7b</i> MO                  | n=2  | dermomyotome (weak stain)<br>2/2 (100%)-ablated Pax7 protein in dermomyotome (weak stain) and xanthophores (intense stain) |
| Suppl. Fig13B   | myod ISH, 50hpf       | control                             | n=29 | 29/29 (100%)-myod expression in hypaxial-derived muscles                                                                   |
| Suppl. Fig13B   | myod ISH, 50hpf       | <i>pax7a+7b</i> MO                  | n=31 | 31/31 (100%)-myod expression in hypaxial-derived muscles                                                                   |
| Suppl. Fig13C   | myog ISH, 50hpf       | control                             | n=15 | 15/15 (100%)-myod expression in hypaxial-derived muscles                                                                   |
| Suppl. Fig13C   | myog ISH, 50hpf       | <i>pax7a+7b</i> MO                  | n=25 | 25/25 (100%)-myod expression in hypaxial-derived muscles                                                                   |
| Suppl. Fig13D   | MyHC IHC, 96hpf       | control                             | n=10 | 10/10 (100%)-MyHC in OSM                                                                                                   |
| Suppl. Fig13D   | MyHC IHC, 96hpf       | <i>pax7a+7b</i> MO                  | n=9  | 9/9 (100%)-MyHC in OSM                                                                                                     |
| Suppl. Fig14A,B | <i>dct</i> ISH, 24hpf | control                             | n=26 | 26/26 (100%)-normal <i>dct</i> expression                                                                                  |
| Suppl. Fig14C,D | <i>dct</i> ISH, 24hpf | <i>pax3a</i> MO1                    | n=25 | 20/25 (80%)-reduced <i>dct</i> expression                                                                                  |
| Suppl. Fig14E,F | <i>dct</i> ISH, 24hpf | <i>pax3b</i> MO2                    | n=32 | 29/32 (91%)-reduced <i>dct</i> expression                                                                                  |
| Suppl. Fig14G,H | <i>dct</i> ISH, 24hpf | <i>pax3a</i> MO1 + <i>pax3b</i> MO1 | n=29 | 25/29 (86%)-reduced <i>dct</i> expression                                                                                  |
| Suppl. Fig14I,J | DP312 IHC, 24hpf      | control                             | n=20 | 20/20 (100%)-normal DP+ xanthophores                                                                                       |
| Suppl. Fig14K,L | DP312 IHC, 24hpf      | <i>pax3a</i> MO1                    | n=19 | 15/19 (79%)-reduced DP+ xanthophores                                                                                       |
| Suppl. Fig14M,N | DP312 IHC, 24hpf      | <i>pax3b</i> MO2                    | n=22 | 22/22 (100%)-normal DP+ xanthophores                                                                                       |
| Suppl. Fig14O,P | DP312 IHC, 24hpf      | <i>pax3a</i> MO1 + <i>pax3b</i> MO1 | n=21 | 21/21 (100%)-normal DP+ xanthophores                                                                                       |

CCV= common cardinal vein  
GIT= gastrointestinal tract  
OSM= oesophageal striated muscle  
PFM= pectoral fin muscle  
PFV= pectoral fin vasculature  
PHM= posterior hypaxial muscle  
SHM= sternohyoideus muscle  
TV= tranversus ventralis

**Table S2. Morpholino sequences used for zebrafish experiments**

| Gene             | Sequence (5'→3')           | Amount of MO injected (ng) | Reference                 |
|------------------|----------------------------|----------------------------|---------------------------|
| <i>pax3a</i> MO1 | CTAATGCGGTCATATCTCCTCTGCA  | 4                          | Minchin and Hughes (2008) |
| <i>pax3a</i> MO2 | AAAGGATGCACGAAGCACTTGATAG  | 2                          | Minchin and Hughes (2008) |
| <i>pax3b</i> MO1 | CCTGGGAAAGCGGTCATTGCTCCG   | 2                          |                           |
| <i>pax3b</i> MO2 | AGCGTTGACCAAATCTTAGGACTT   | 4                          |                           |
| <i>myod</i>      | ATATCCGACAACCTCCATCTTTTTTG | 4                          | Hinits et al. (2009)      |
| <i>p53</i>       | GCGCCATTGCTTTGCAAGAATTG    | 3                          | Robu et al. (2007)        |



**Table S3. Probes for *in situ* mRNA hybridisation in zebrafish**

| <b>Gene</b>  | <b>Reference</b>          |
|--------------|---------------------------|
| <i>pax3a</i> | Seo et al. (1998)         |
| <i>pax3b</i> | Minchin and Hughes (2008) |
| <i>pax7a</i> | Seo et al. (1998)         |
| <i>pax7b</i> | Minchin and Hughes (2008) |
| <i>myf5</i>  | Groves et al. (2005)      |
| <i>myod</i>  | Weinberg et al. (1996)    |
| <i>myog</i>  | Weinberg et al. (1996)    |
| <i>mylz2</i> | Xu et al. (2000)          |
| <i>lhx2</i>  | Neyt et al. (2000)        |
| <i>dlx2a</i> | Akimenko et al. (1994)    |
| <i>dct</i>   | Kelsh et al. (2000)       |

**Table S4. Primers for qRT-PCR and the role of the protein encoded**

| Gene                                                                                   | Metabolic process        | Reference                |
|----------------------------------------------------------------------------------------|--------------------------|--------------------------|
| <i>phospholipase A2 group 1b</i><br>( <i>pla2g1b</i> )                                 | Lipid metabolism         | (Hama et al., 2009)      |
| <i>adiponectin receptor 1a</i><br>( <i>adipor1a</i> )                                  | Glucose/lipid metabolism | (Nishio et al., 2008)    |
| <i>amylase</i> ( <i>amyl</i> )                                                         | Glucose metabolism       | (Imrie and Sadler, 2010) |
| <i>fatty acid binding protein 10</i><br>( <i>fabp10</i> )                              | Lipid metabolism         | (Imrie and Sadler, 2010) |
| <i>peroxisome proliferator-activated receptor <math>\gamma</math></i> ( <i>pparg</i> ) | Glucose/lipid metabolism | (Imrie and Sadler, 2010) |

**Table S5. Quantification of fate mapping in mouse**

| Age   | Genotype                                      | Number of animals sectioned | Result                                                                                                                                                                                                     |
|-------|-----------------------------------------------|-----------------------------|------------------------------------------------------------------------------------------------------------------------------------------------------------------------------------------------------------|
| E15.5 | <i>Pax3</i> <sup>Cre/+</sup> ;<br><i>Z/AP</i> | 3                           | Only the most rostral section of the oesophagus has sarcomeric myosin at this stage. Several sections were found in each animal to contain between 1 and 10 AP+/sarcomeric MyHC+ cells.                    |
| E15.5 | <i>Pax3</i> <sup>Cre/+</sup> ;<br><i>R26R</i> | 4                           | Only the most rostral section of the oesophagus has sarcomeric myosin at this stage. Several sections were seen within each animal to contain between 1 and 10 EYFP+/sarcomeric MyHC+ cells (see Fig. 1B). |
| E17.5 | <i>Pax3</i> <sup>Cre/+</sup> ;<br><i>R26R</i> | 2                           | A larger area of the oesophagus contains sarcomeric myosin, many MyHC+ cells are weakly EYFP+.                                                                                                             |
| P0    | <i>Pax3</i> <sup>Cre/+</sup> ;<br><i>Z/AP</i> | 1                           | A much larger area of the rostral oesophagus has sarcomeric myosin, with many fibres being AP <sup>+</sup> . Fig.1C is a fair representation of most of this area.                                         |



**Table S6. Quantification of *Pax7*<sup>CE</sup> contribution to muscle fibres in outer and inner OSM layers**

|                           | <b>Tam E9.5</b> | <b>Tam E10.5</b> | <b>Tam E11.5</b> | <b>Tam E12.5</b> |
|---------------------------|-----------------|------------------|------------------|------------------|
| <b>Outer layer</b>        | 14              | 20               | 128              | 210              |
|                           | 10              | 32               | 149              | 245              |
|                           | 7               | 23               | 152              | 198              |
| <b>Mean</b>               | 10.3            | 25               | 143              | 217.7            |
| <b>Standard deviation</b> | 3.5             | 6.2              | 13.1             | 24.4             |
|                           |                 |                  |                  |                  |
| <b>Inner layer</b>        | 0               | 0                | 10               | 16               |
|                           | 0               | 1                | 6                | 13               |
|                           | 0               | 0                | 12               | 21               |
| <b>Mean</b>               | 0               | 0.3              | 9.3              | 16.7             |
| <b>Standard deviation</b> | 0               | 0.6              | 3.1              | 4.0              |

Number of X-gal-labelled cells per section are shown.
